# Supplementary material for: Formation of thiolate-bridged diiron complexes featuring anionic isocyanide originating from the activation of counterions in the outer sphere
Source: Royal Society of Chemistry journal article supplement (doi:10.1039/d1dt03482k), 2021-01-01
Supplement: d1dt03482k1.pdf [file d1dt03482k1.pdf]

Electronic Supplementary Information

**Formation of thiolate-bridged diiron complexes featuring  
anionic isocyanide originating from the activation of  
counterions in the outer sphere**

Sunlin Xu,<sup>a</sup> Dawei Yang,<sup>\*a</sup> Jinfeng Zhao,<sup>a</sup> Baomin Wang,<sup>a</sup> and Jingping Qu<sup>\*a</sup>

*<sup>a</sup>State Key Laboratory of Fine Chemicals, Dalian University of Technology, 2 Linggong  
Road, Dalian 116024, P. R. China*

\*E-mail: qujp@dlut.edu.cn (J.Q.)

yangdw@dlut.edu.cn (D.Y.)

## **Contents:**

|                                                   |            |
|---------------------------------------------------|------------|
| <b>I. X-ray crystallographic data .....</b>       | <b>S3</b>  |
| <b>II. ESI high resolution mass spectra .....</b> | <b>S18</b> |
| <b>III. NMR spectra .....</b>                     | <b>S19</b> |
| <b>IV. IR spectra .....</b>                       | <b>S28</b> |
| <b>IV. <i>In situ</i> infrared spectra.....</b>   | <b>S31</b> |

## I. X-ray crystallographic data

**Table S1.** Crystallographic data for **2** and **3**.

|                                                                                         | <b>2</b>                                                                                      | <b>3</b>                                                                      |
|-----------------------------------------------------------------------------------------|-----------------------------------------------------------------------------------------------|-------------------------------------------------------------------------------|
| Formula                                                                                 | C <sub>27</sub> H <sub>43</sub> F <sub>6</sub> Fe <sub>2</sub> N <sub>2</sub> PS <sub>2</sub> | C <sub>26</sub> H <sub>39</sub> Fe <sub>2</sub> N <sub>2</sub> S <sub>2</sub> |
| Formula weight                                                                          | 716.42                                                                                        | 555.41                                                                        |
| Crystal dimensions (mm <sup>3</sup> )                                                   | 0.4 × 0.3 × 0.2                                                                               | 0.4 × 0.3 × 0.3                                                               |
| Crystal system                                                                          | Monoclinic                                                                                    | Monoclinic                                                                    |
| Space group                                                                             | <i>P2<sub>1</sub>/m</i>                                                                       | <i>P2<sub>1</sub>/c</i>                                                       |
| a (Å)                                                                                   | 9.197(3)                                                                                      | 10.6910(8)                                                                    |
| b (Å)                                                                                   | 16.209(4)                                                                                     | 14.4262(11)                                                                   |
| c (Å)                                                                                   | 10.954(3)                                                                                     | 17.5493(13)                                                                   |
| α (°)                                                                                   | 90                                                                                            | 90                                                                            |
| β (°)                                                                                   | 90.286(4)                                                                                     | 94.3180(10)                                                                   |
| γ (°)                                                                                   | 90                                                                                            | 90                                                                            |
| Volume (Å <sup>3</sup> )                                                                | 1632.9(8)                                                                                     | 2699.0(4)                                                                     |
| Z                                                                                       | 2                                                                                             | 4                                                                             |
| T (K)                                                                                   | 300.13                                                                                        | 300.16                                                                        |
| D <sub>calcd</sub> (g cm <sup>-3</sup> )                                                | 1.457                                                                                         | 1.367                                                                         |
| μ (mm <sup>-1</sup> )                                                                   | 1.119                                                                                         | 1.246                                                                         |
| F (000)                                                                                 | 744.0                                                                                         | 1172.0                                                                        |
| No. of rflns. collected                                                                 | 24159                                                                                         | 33469                                                                         |
| No. of indep. rflns. / R <sub>int</sub>                                                 | 3090 / 0.0457                                                                                 | 6195 / 0.0547                                                                 |
| No. of obsd. rflns. [ <i>I</i> <sub>0</sub> > 2σ( <i>I</i> <sub>0</sub> )]              | 2866                                                                                          | 4566                                                                          |
| Data / restraints / parameters                                                          | 3090 / 0 / 208                                                                                | 6195 / 1 / 312                                                                |
| R <sub>1</sub> / wR <sub>2</sub> [ <i>I</i> <sub>0</sub> > 2σ( <i>I</i> <sub>0</sub> )] | 0.0312 / 0.0730                                                                               | 0.0393 / 0.0869                                                               |
| R <sub>1</sub> / wR <sub>2</sub> (all data)                                             | 0.0368 / 0.0769                                                                               | 0.0651 / 0.0970                                                               |
| GOF (on <i>F</i> <sup>2</sup> )                                                         | 1.132                                                                                         | 1.017                                                                         |
| Largest diff. peak and hole (e Å <sup>-3</sup> )                                        | 0.268 / -0.460                                                                                | 0.428 / -0.327                                                                |
| CCDC No.                                                                                | 2098968                                                                                       | 2098969                                                                       |

**Table S2.** Crystallographic data for **4** and **5**.

|                                                  | <b>4</b>                                                                                                        | <b>5</b>                                                                                                     |
|--------------------------------------------------|-----------------------------------------------------------------------------------------------------------------|--------------------------------------------------------------------------------------------------------------|
| Formula                                          | C <sub>29</sub> H <sub>48</sub> F <sub>11</sub> Fe <sub>2</sub> N <sub>2</sub> P <sub>2</sub> S <sub>2</sub> Si | C <sub>26</sub> H <sub>40</sub> F <sub>10</sub> Fe <sub>2</sub> N <sub>2</sub> P <sub>2</sub> S <sub>2</sub> |
| Formula weight                                   | 899.54                                                                                                          | 808.36                                                                                                       |
| Crystal dimensions (mm <sup>3</sup> )            | 0.4 × 0.3 × 0.2                                                                                                 | 0.2 × 0.2 × 0.1                                                                                              |
| Crystal system                                   | Orthorhombic                                                                                                    | Monoclinic                                                                                                   |
| Space group                                      | <i>Pbca</i>                                                                                                     | <i>C2/c</i>                                                                                                  |
| a (Å)                                            | 17.0907(10)                                                                                                     | 10.479(3)                                                                                                    |
| b (Å)                                            | 15.7948(9)                                                                                                      | 19.104(5)                                                                                                    |
| c (Å)                                            | 32.7765(18)                                                                                                     | 17.747(5)                                                                                                    |
| $\alpha$ (°)                                     | 90                                                                                                              | 90                                                                                                           |
| $\beta$ (°)                                      | 90                                                                                                              | 105.836(6)                                                                                                   |
| $\gamma$ (°)                                     | 90                                                                                                              | 90                                                                                                           |
| Volume (Å <sup>3</sup> )                         | 8847.8(9)                                                                                                       | 3417.9(17)                                                                                                   |
| Z                                                | 8                                                                                                               | 4                                                                                                            |
| T (K)                                            | 173.0                                                                                                           | 298.0                                                                                                        |
| $D_{\text{calcd}}$ (g cm <sup>-3</sup> )         | 1.351                                                                                                           | 1.571                                                                                                        |
| $\mu$ (mm <sup>-1</sup> )                        | 0.917                                                                                                           | 1.140                                                                                                        |
| $F(000)$                                         | 3704.0                                                                                                          | 1656.0                                                                                                       |
| No. of rflns. collected                          | 40160                                                                                                           | 8048                                                                                                         |
| No. of indep. rflns. / $R_{\text{int}}$          | 7855 / 0.0678                                                                                                   | 3108 / 0.0245                                                                                                |
| No. of obsd. rflns. [ $I_0 > 2\sigma(I_0)$ ]     | 4966                                                                                                            | 2502                                                                                                         |
| Data / restraints / parameters                   | 7855 / 361 / 619                                                                                                | 3108 / 66 / 224                                                                                              |
| $R_1 / wR_2$ [ $I_0 > 2\sigma(I_0)$ ]            | 0.0648 / 0.1579                                                                                                 | 0.0445 / 0.1092                                                                                              |
| $R_1 / wR_2$ (all data)                          | 0.1156 / 0.1830                                                                                                 | 0.0586 / 0.1195                                                                                              |
| GOF (on $F^2$ )                                  | 1.024                                                                                                           | 1.040                                                                                                        |
| Largest diff. peak and hole (e Å <sup>-3</sup> ) | 0.596 / -0.487                                                                                                  | 0.487 / -0.563                                                                                               |
| CCDC No.                                         | 2083465                                                                                                         | 2083463                                                                                                      |

**Table S3.** Crystallographic data for **6** and **7**.

|                                                                                                       | <b>6</b>                                                                                       | <b>7</b>                                                                                                     |
|-------------------------------------------------------------------------------------------------------|------------------------------------------------------------------------------------------------|--------------------------------------------------------------------------------------------------------------|
| Formula                                                                                               | C <sub>44</sub> H <sub>55</sub> BF <sub>5</sub> Fe <sub>2</sub> N <sub>2</sub> PS <sub>2</sub> | C <sub>33</sub> H <sub>50</sub> F <sub>11</sub> Fe <sub>2</sub> N <sub>3</sub> P <sub>2</sub> S <sub>2</sub> |
| Formula weight                                                                                        | 924.50                                                                                         | 935.52                                                                                                       |
| Crystal dimensions (mm <sup>3</sup> )                                                                 | 0.4 × 0.2 × 0.2                                                                                | 0.4 × 0.4 × 0.3                                                                                              |
| Crystal system                                                                                        | Triclinic                                                                                      | Orthorhombic                                                                                                 |
| Space group                                                                                           | <i>P</i> 1                                                                                     | <i>Pnma</i>                                                                                                  |
| a (Å)                                                                                                 | 10.1726(6)                                                                                     | 20.6464(13)                                                                                                  |
| b (Å)                                                                                                 | 11.9179(7)                                                                                     | 12.2863(8)                                                                                                   |
| c (Å)                                                                                                 | 18.6830(11)                                                                                    | 18.6507(12)                                                                                                  |
| $\alpha$ (°)                                                                                          | 97.2170(10)                                                                                    | 90                                                                                                           |
| $\beta$ (°)                                                                                           | 97.8230(10)                                                                                    | 90                                                                                                           |
| $\gamma$ (°)                                                                                          | 103.6040(10)                                                                                   | 90                                                                                                           |
| Volume (Å <sup>3</sup> )                                                                              | 2151.6(2)                                                                                      | 4731.1(5)                                                                                                    |
| <i>Z</i>                                                                                              | 2                                                                                              | 4                                                                                                            |
| <i>T</i> (K)                                                                                          | 173.0                                                                                          | 233.0                                                                                                        |
| <i>D</i> <sub>calcd</sub> (g cm <sup>-3</sup> )                                                       | 1.427                                                                                          | 1.313                                                                                                        |
| $\mu$ (mm <sup>-1</sup> )                                                                             | 0.864                                                                                          | 0.837                                                                                                        |
| <i>F</i> (000)                                                                                        | 964.0                                                                                          | 1928.0                                                                                                       |
| No. of rflns. collected                                                                               | 42504                                                                                          | 23032                                                                                                        |
| No. of indep. rflns. / <i>R</i> <sub>int</sub>                                                        | 17536 / 0.0541                                                                                 | 4021 / 0.0267                                                                                                |
| No. of obsd. rflns. [ <i>I</i> <sub>0</sub> > 2σ( <i>I</i> <sub>0</sub> )]                            | 13772                                                                                          | 3510                                                                                                         |
| Data / restraints / parameters                                                                        | 17536/ 4 / 1052                                                                                | 4021/ 12 / 285                                                                                               |
| <i>R</i> <sub>1</sub> / <i>wR</i> <sub>2</sub> [ <i>I</i> <sub>0</sub> > 2σ( <i>I</i> <sub>0</sub> )] | 0.0498 / 0.0842                                                                                | 0.0513 / 0.1334                                                                                              |
| <i>R</i> <sub>1</sub> / <i>wR</i> <sub>2</sub> (all data)                                             | 0.0773 / 0.0915                                                                                | 0.0580 / 0.1412                                                                                              |
| GOF (on <i>F</i> <sup>2</sup> )                                                                       | 1.016                                                                                          | 1.026                                                                                                        |
| Largest diff. peak and hole (e Å <sup>-3</sup> )                                                      | 0.530 / -0.386                                                                                 | 1.402/ -0.534                                                                                                |
| CCDC No.                                                                                              | 2083466                                                                                        | 2083464                                                                                                      |

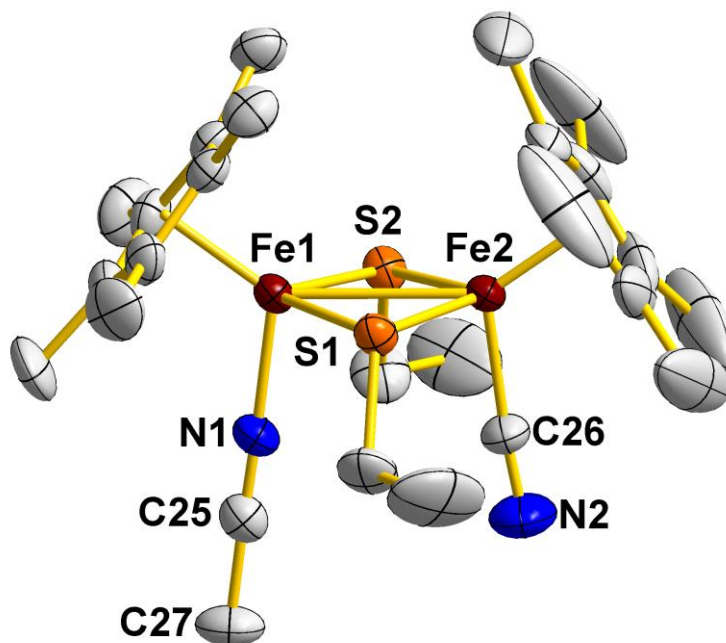

**Figure S1.** ORTEP diagram of **2**.

The thermal ellipsoids are shown at a 50% probability level. All hydrogen atoms and counter anion  $\text{PF}_6^-$  are omitted for clarity.

**Table S4.** Selected bond distances (Å) and angles (°) for **2**.

| Distances (Å)          |            |            |            |
|------------------------|------------|------------|------------|
| Fe1–Fe2                | 2.7533(11) | Fe1–S1     | 2.2132(10) |
| Fe1–S2                 | 2.2132(10) | Fe2–S1     | 2.2209(10) |
| Fe2–S2                 | 2.2209(10) | Fe1–N1     | 1.912(4)   |
| N1–C25                 | 1.123(6)   | Fe2–C26    | 1.893(5)   |
| C26–N2                 | 1.116(7)   |            |            |
| Angles (°)             |            |            |            |
| Fe1–S1–Fe2             | 76.77(3)   | Fe1–S2–Fe2 | 76.77(3)   |
| Fe1–N1–C25             | 178.6(4)   | Fe2–C26–N2 | 176.1(5)   |
| Torsion angles (°)     |            |            |            |
| S1–Fe1Fe2–S2           | 7.5(5)     |            |            |
| Dihedral angles (°)    |            |            |            |
| Cp*1 <sup>^</sup> Cp*2 | 69.1(1)    |            |            |

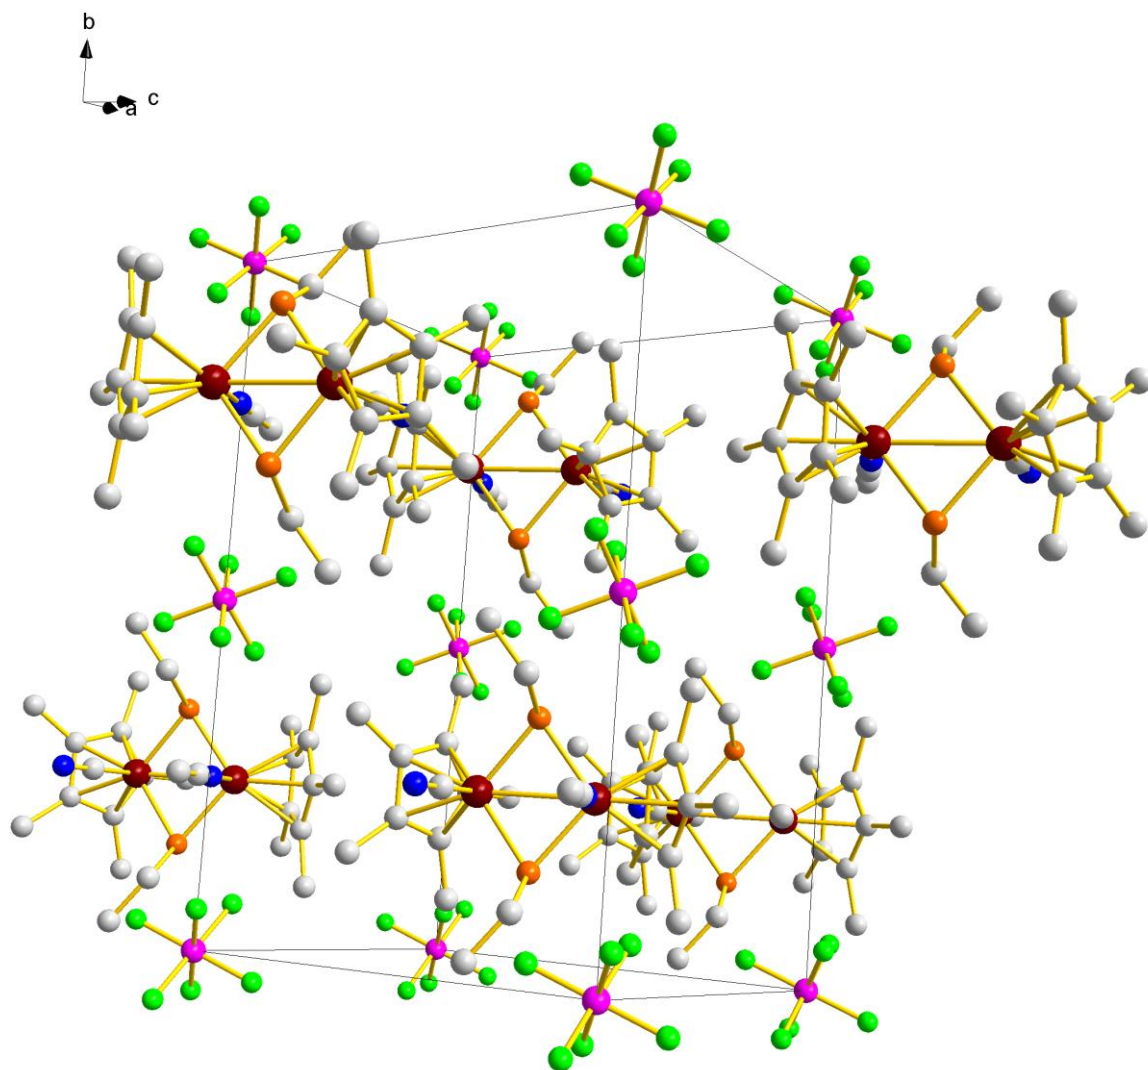

**Figure S2.** Crystal packing diagram of **2**.

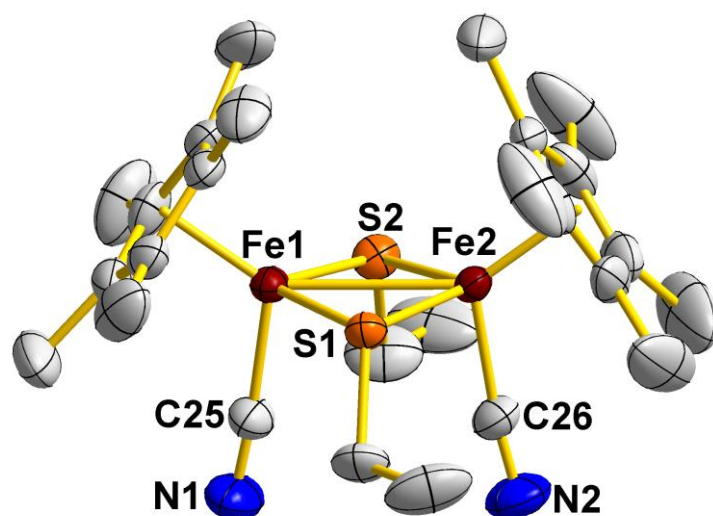

**Figure S3.** ORTEP diagram of **3**.

The thermal ellipsoids are shown at a 50% probability level. All hydrogen atoms are omitted for clarity.

**Table S5.** Selected bond distances (Å) and angles (°) for **3**.

| Distances (Å)          |           |            |           |
|------------------------|-----------|------------|-----------|
| Fe1–Fe2                | 2.7479(5) | Fe1–S1     | 2.2042(7) |
| Fe1–S2                 | 2.2042(8) | Fe2–S1     | 2.2048(7) |
| Fe2–S2                 | 2.2148(8) | Fe1–C25    | 1.902(3)  |
| C25–N1                 | 1.143(4)  | Fe2–C26    | 1.903(3)  |
| C26–N2                 | 1.145(4)  |            |           |
| Angles (°)             |           |            |           |
| Fe1–S1–Fe2             | 77.11(2)  | Fe1–S2–Fe2 | 76.90(3)  |
| Fe1–C25–N1             | 175.9(3)  | Fe2–C26–N2 | 174.3(3)  |
| Torsion angles (°)     |           |            |           |
| S1–Fe1Fe2–S2           | 9.1(3)    |            |           |
| Dihedral angles (°)    |           |            |           |
| Cp*1 <sup>^</sup> Cp*2 | 68.9(1)   |            |           |



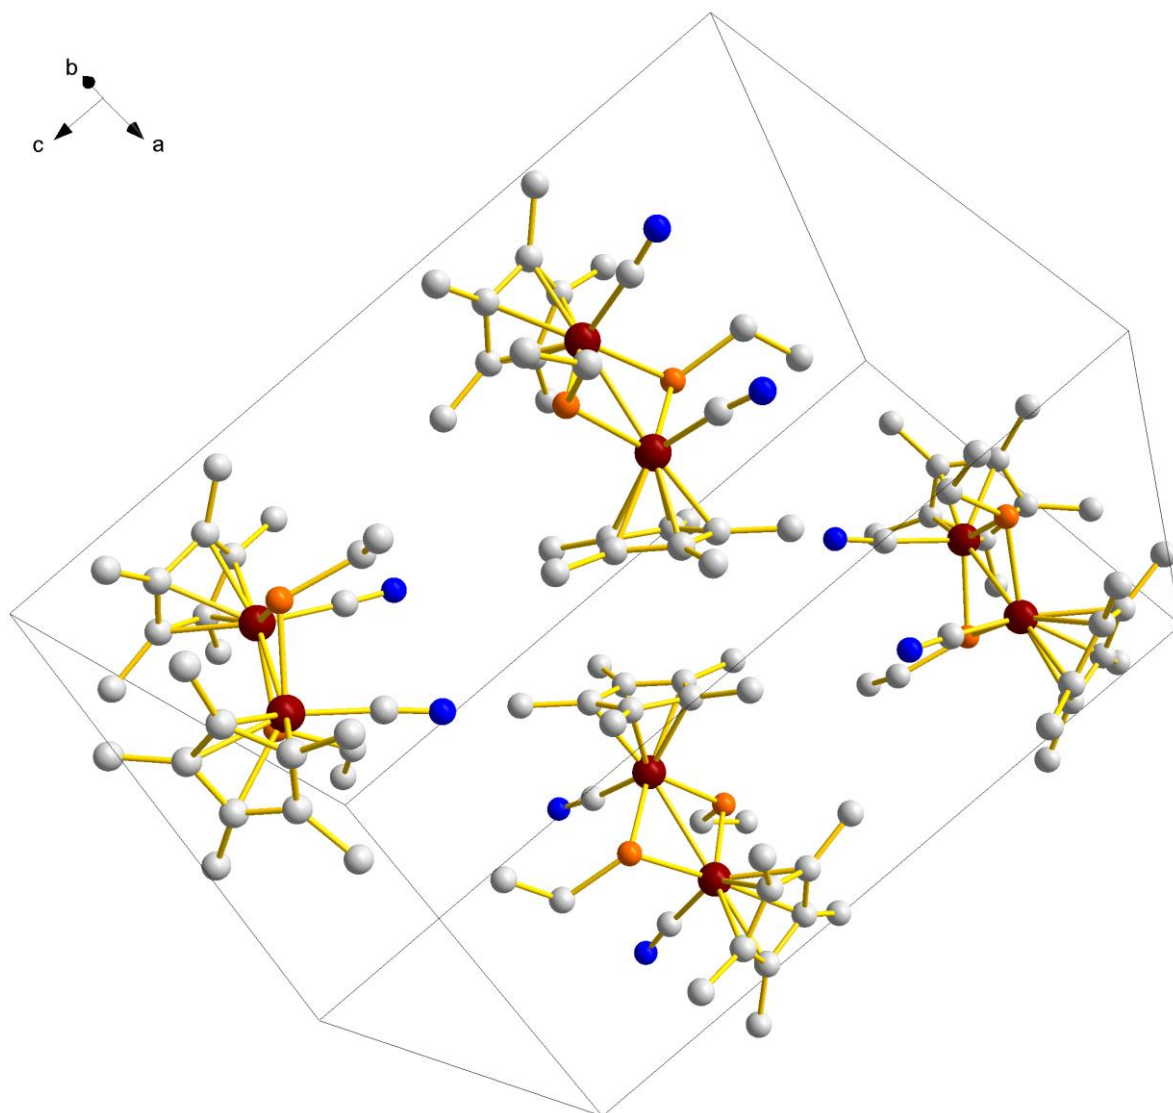

**Figure S4.** Crystal packing diagram of **3**.

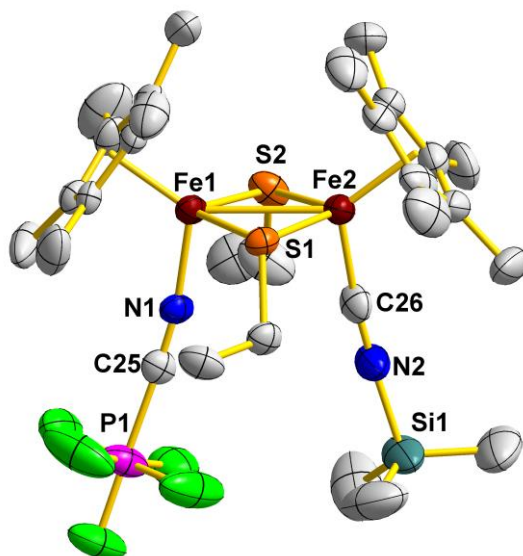

**Figure S5.** ORTEP diagram of **4**.

The thermal ellipsoids are shown at a 50% probability level. All hydrogen atoms and counter anion  $\text{PF}_6^-$  are omitted for clarity

**Table S6.** Selected bond distances (Å) and angles (°) for **4**.

| Distances (Å)          |            |            |            |
|------------------------|------------|------------|------------|
| Fe1–Fe2                | 2.7441(10) | Fe1–S1     | 2.2165(14) |
| Fe1–S2                 | 2.2223(18) | Fe2–S1     | 2.2167(15) |
| Fe2–S2                 | 2.2134(16) | Fe1–N1     | 1.914(5)   |
| N1–C25                 | 1.146(7)   | C25–P1     | 1.867(6)   |
| Fe2–C26                | 1.827(6)   | C26–N2     | 1.171(7)   |
| N2–Si1                 | 1.802(6)   |            |            |
| Angles (°)             |            |            |            |
| Fe1–S1–Fe2             | 76.48(5)   | Fe1–S2–Fe2 | 76.43(5)   |
| Fe1–N1–C25             | 170.8(5)   | N1–C25–P1  | 176.1(5)   |
| Fe2–C26–N2             | 174.3(5)   | C26–N2–Si1 | 170.8(6)   |
| Torsion angles (°)     |            |            |            |
| S1–Fe1Fe2–S2           | 7.4(6)     |            |            |
| Dihedral angles (°)    |            |            |            |
| Cp*1 <sup>^</sup> Cp*2 | 72.7(5)    |            |            |

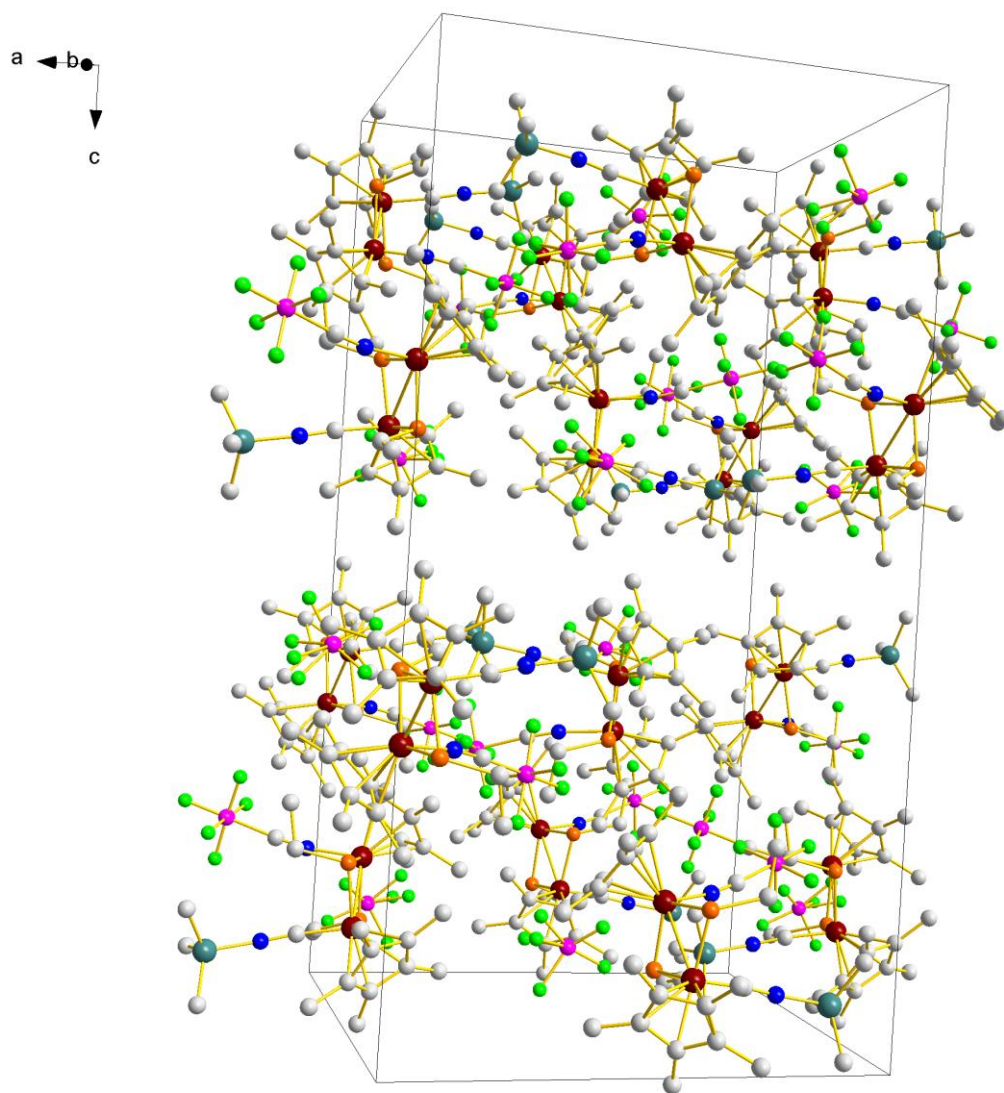

**Figure S6.** Crystal packing diagram of **4**.

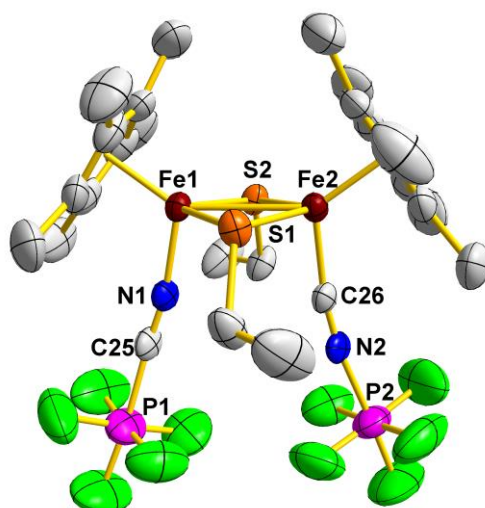

**Figure S7.** ORTEP diagram of **5**.

The thermal ellipsoids are shown at a 50% probability level. All hydrogen atoms are omitted for clarity.

**Table S7.** Selected bond distances (Å) and angles (°) for **5**.

|                        |            |            |            |
|------------------------|------------|------------|------------|
| Distances (Å)          |            |            |            |
| Fe1–Fe2                | 2.7596(11) | Fe1–S1     | 2.2221(11) |
| Fe1–S2                 | 2.2221(11) | Fe2–S1     | 2.2219(11) |
| Fe2–S2                 | 2.2219(11) | Fe1–N1     | 1.899(9)   |
| C25–N1                 | 1.129(10)  | C25–P1     | 1.856(10)  |
| Fe2–C26                | 1.906(10)  | C26–N2     | 1.133(9)   |
| N2–P2                  | 1.857(8)   |            |            |
| Angles (°)             |            |            |            |
| Fe1–S1–Fe2             | 76.77(3)   | Fe1–S2–Fe2 | 76.77(3)   |
| Fe1–N1–C25             | 169(3)     | N1–C25–P1  | 170.6(18)  |
| Fe2–C26–N2             | 171(3)     | C26–N2–P2  | 172(2)     |
| Torsion angles (°)     |            |            |            |
| S1–Fe1Fe2–S2           | 7.2(6)     |            |            |
| Dihedral angles (°)    |            |            |            |
| Cp*1 <sup>^</sup> Cp*2 | 67.2(6)    |            |            |

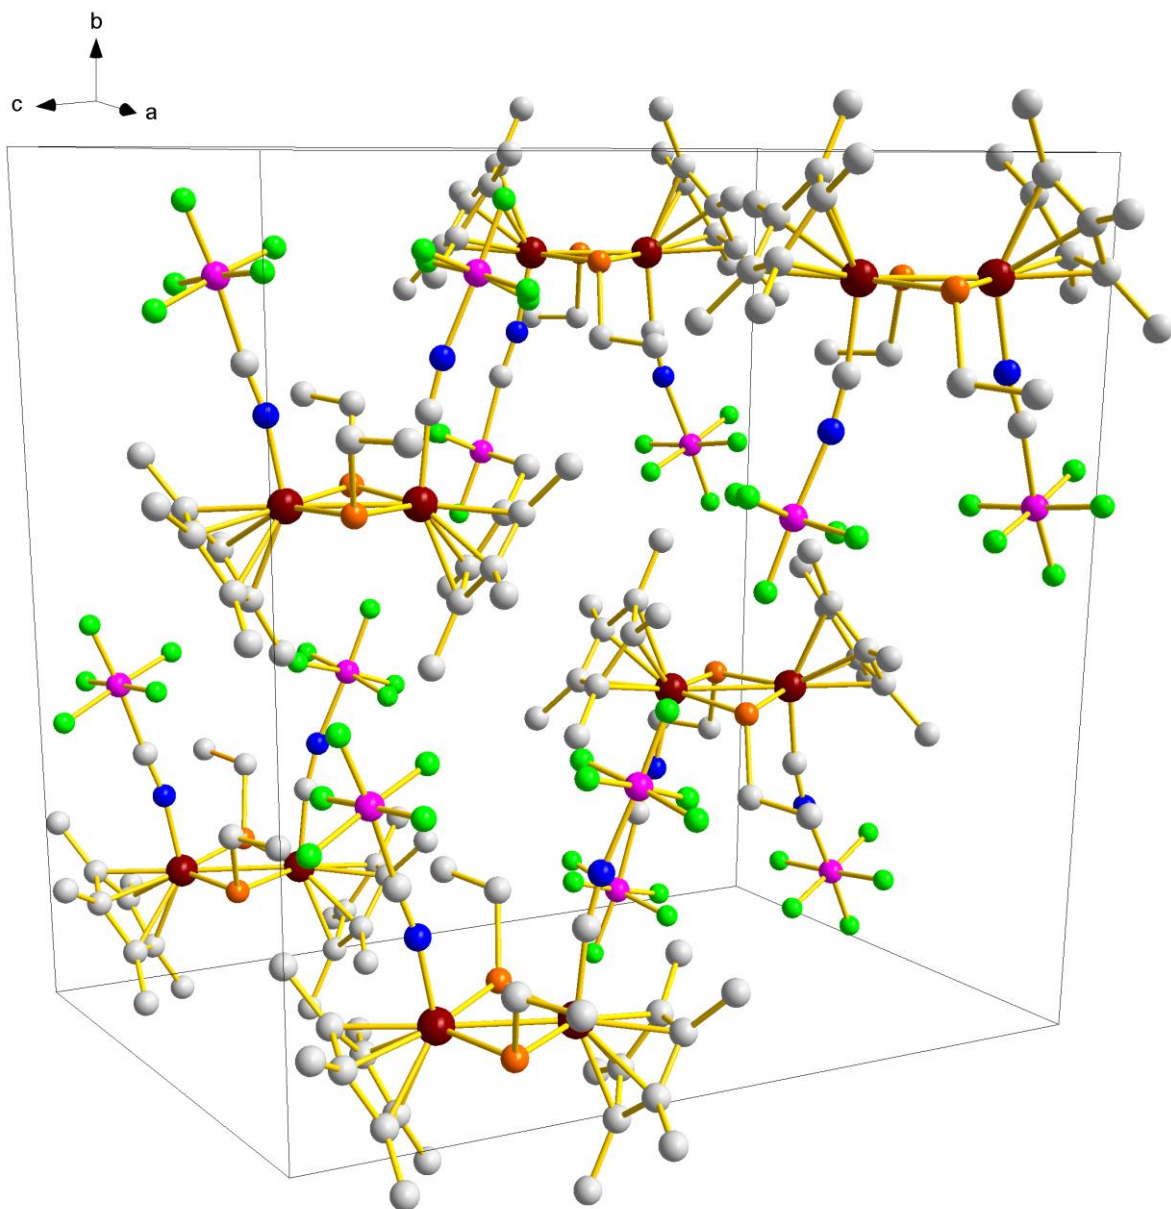

**Figure S8.** Crystal packing diagram of **5**.

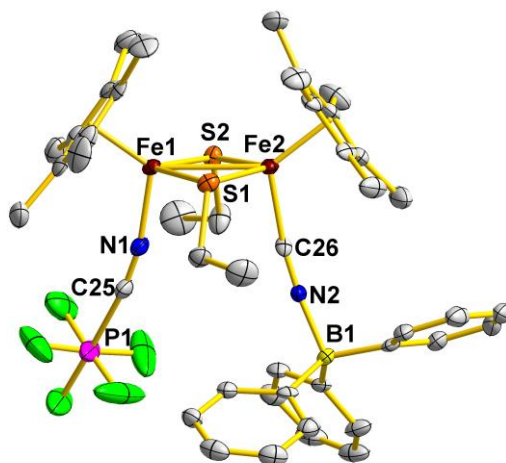

**Figure S9.** ORTEP diagram of **6**.

The thermal ellipsoids are shown at a 50% probability level. All hydrogen atoms are omitted for clarity.

**Table S8.** Selected bond distances (Å) and angles (°) for **6**.

| Distances (Å)          |            |            |            |
|------------------------|------------|------------|------------|
| Fe1–Fe2                | 2.7572(11) | Fe1–S1     | 2.2230(18) |
| Fe1–S2                 | 2.2112(17) | Fe2–S1     | 2.2091(18) |
| Fe2–S2                 | 2.2198(18) | Fe1–N1     | 1.931(5)   |
| N1–C25                 | 1.136(7)   | C25–P1     | 1.895(7)   |
| Fe2–C26                | 1.911(6)   | C26–N2     | 1.152(7)   |
| N2–B1                  | 1.618(8)   |            |            |
| Angles (°)             |            |            |            |
| Fe1–S1–Fe2             | 76.94(6)   | Fe1–S2–Fe2 | 76.96(6)   |
| Fe1–N1–C25             | 166.4(5)   | N1–C25–P1  | 169.3(6)   |
| Fe2–C26–N2             | 170.6(5)   | C26–N2–B1  | 173.5(5)   |
| Torsion angles (°)     |            |            |            |
| S1–Fe1Fe2–S2           | 5.2(5)     |            |            |
| Dihedral angles (°)    |            |            |            |
| Cp*1 <sup>^</sup> Cp*2 | 71.3(2)    |            |            |

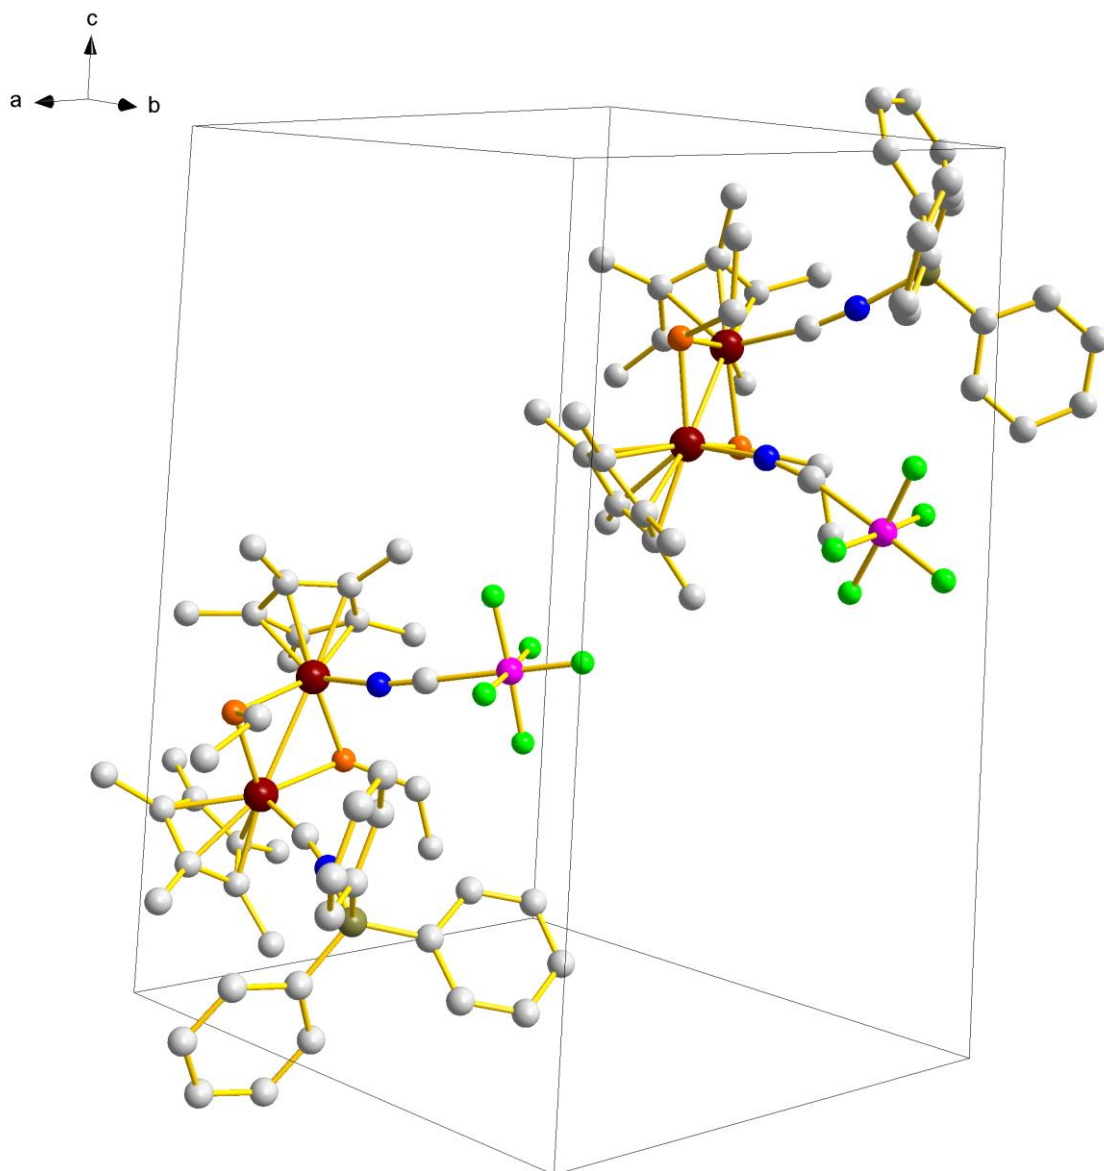

**Figure S10.** Crystal packing diagram of **6**.

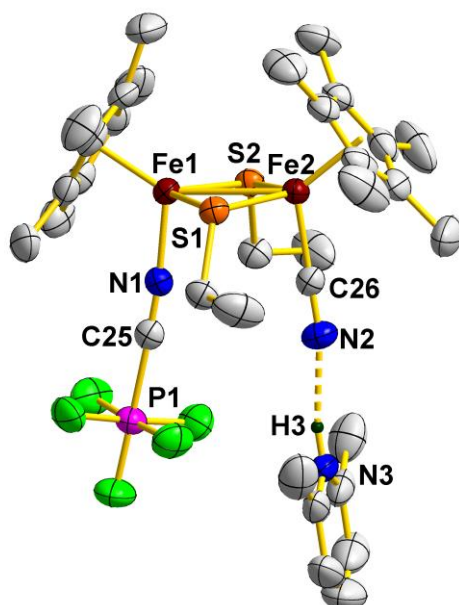

**Figure S11.** ORTEP diagram of **7**.

The thermal ellipsoids are shown at a 50% probability level. All hydrogen atoms except for 2,6-dimethylpyridine group and counter anion  $\text{PF}_6^-$  are omitted for clarity.

**Table S9.** Selected bond distances (Å) and angles (°) for **7**.

| Distances (Å)          |           |            |           |
|------------------------|-----------|------------|-----------|
| Fe1–Fe2                | 2.7449(9) | Fe1–S1     | 2.2314(9) |
| Fe1–S2                 | 2.2163(9) | Fe2–S1     | 2.2314(9) |
| Fe2–S2                 | 2.2163(9) | Fe1–N1     | 1.909(4)  |
| N1–C25                 | 1.136(6)  | C25–P1     | 1.863(5)  |
| Fe2–C26                | 1.894(5)  | C26–N2     | 1.153(6)  |
| Angles (°)             |           |            |           |
| Fe1–S1–Fe2             | 76.22(3)  | Fe1–S2–Fe2 | 76.22(3)  |
| Fe1–N1–C25             | 174.6(4)  | N1–C25–P1  | 178.3(4)  |
| Fe2–C26–N2             | 179.6(4)  |            |           |
| Torsion angles (°)     |           |            |           |
| S1–Fe1Fe2–S2           | 7.4(5)    |            |           |
| Dihedral angles (°)    |           |            |           |
| Cp*1 <sup>^</sup> Cp*2 | 68.1(2)   |            |           |



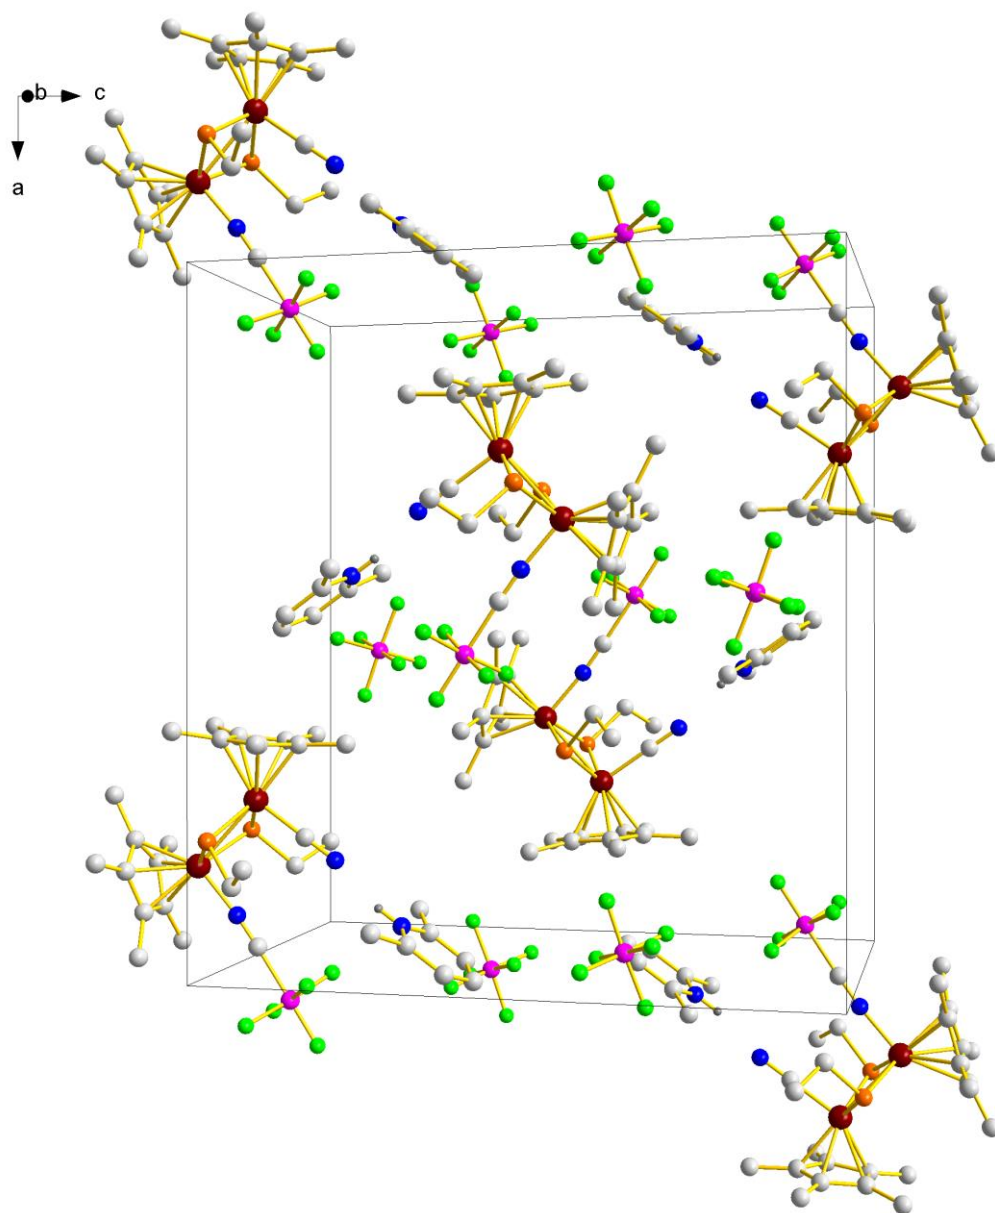

**Figure S12.** Crystal packing diagram of **7**.

## II. ESI high resolution mass spectra

(a)

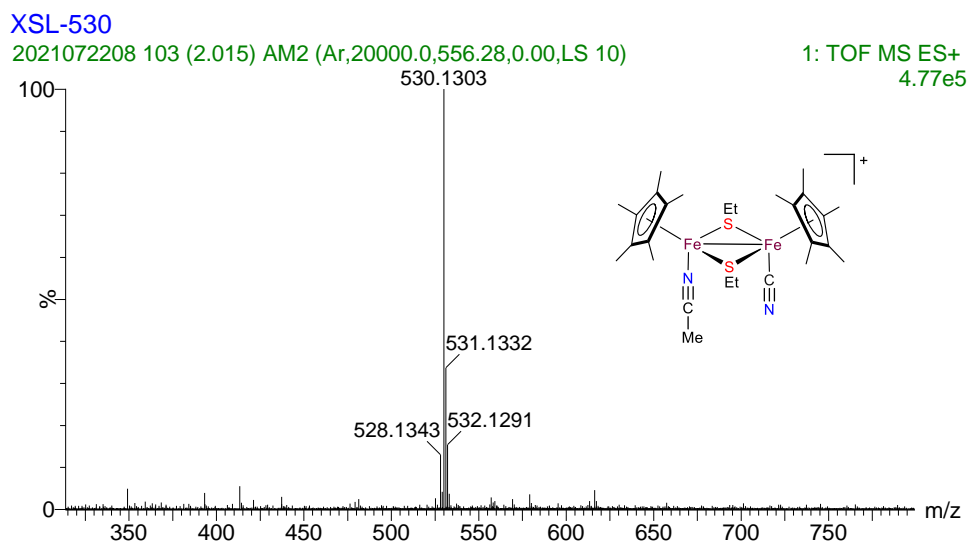

(b)

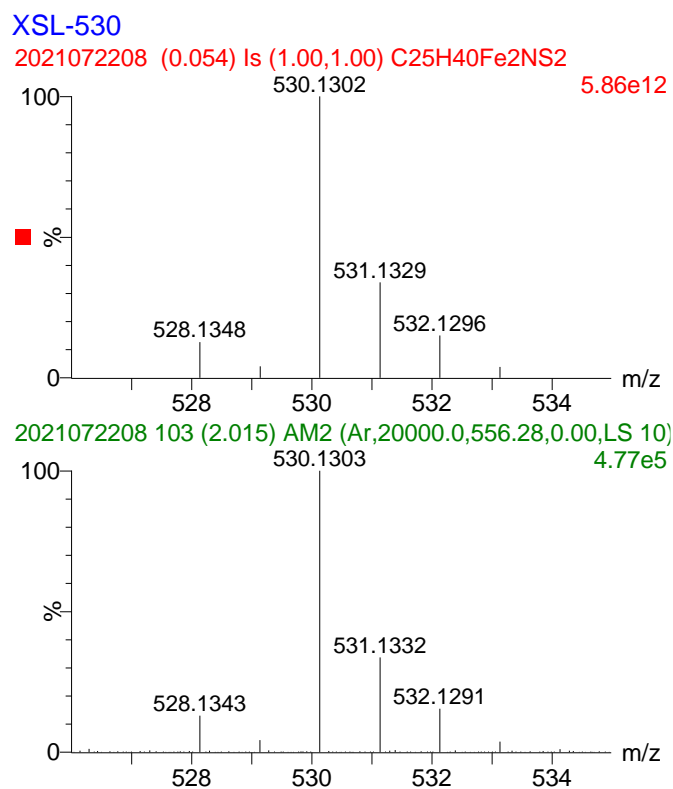

**Figure S13.** High resolution mass spectrum of **2** in CH<sub>2</sub>Cl<sub>2</sub>.

(a) The signal at  $m/z$  530.1303 corresponds to  $[2\text{-MeCN-PF}_6]^+$ . (b) Calculated isotopic distribution for  $[2\text{-PF}_6]^+$  (upper) and the amplifying experimental diagram for  $[2\text{-MeCN-PF}_6]^+$  (bottom).

### III. NMR spectra

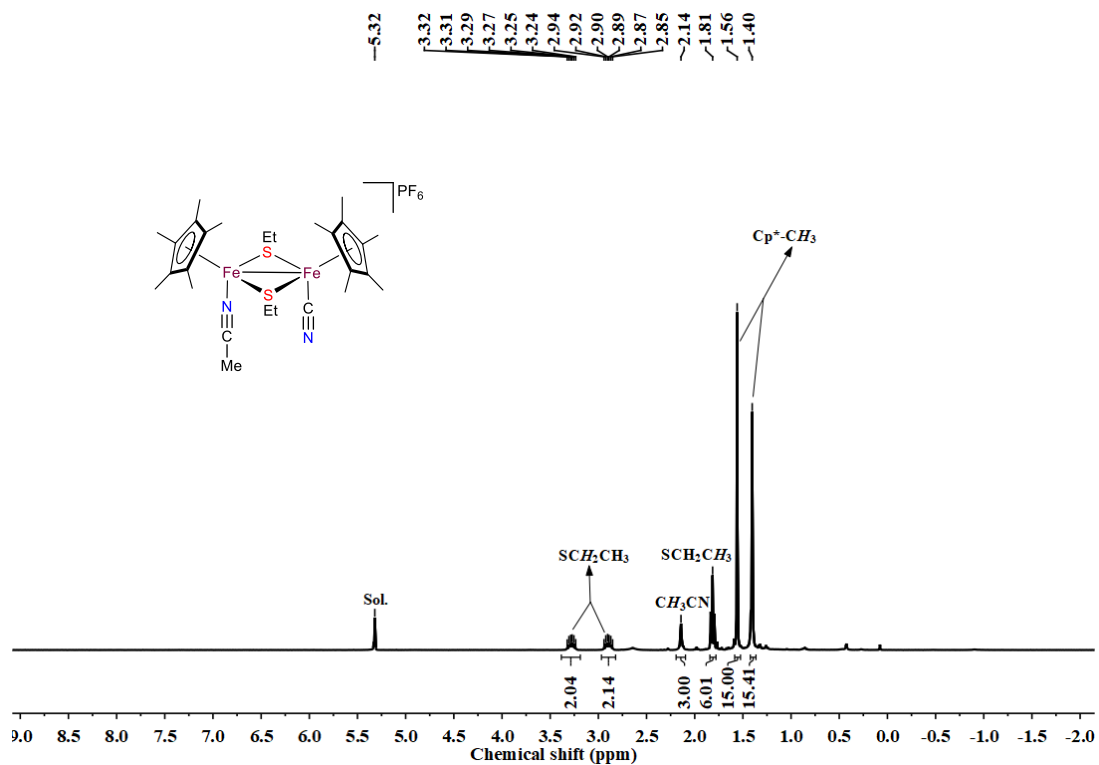

Figure S14. The <sup>1</sup>H NMR spectrum of **2** in CD<sub>2</sub>Cl<sub>2</sub>.

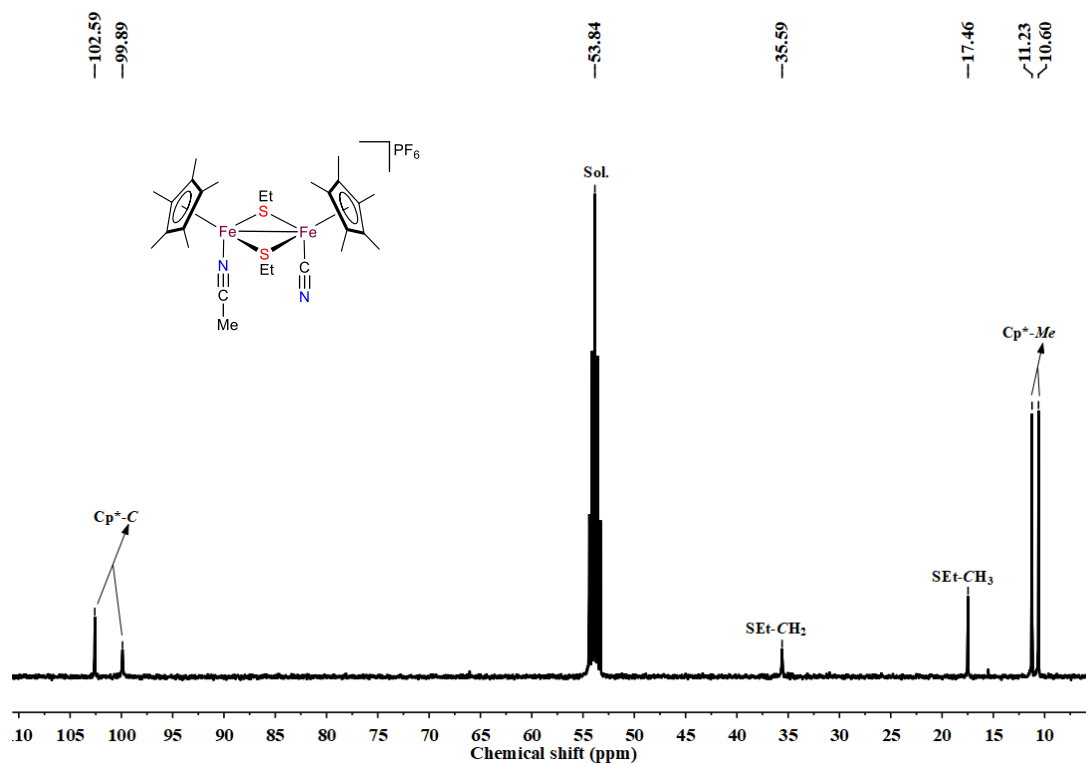

Figure S15. The <sup>13</sup>C NMR spectrum of **2** in CD<sub>2</sub>Cl<sub>2</sub>.

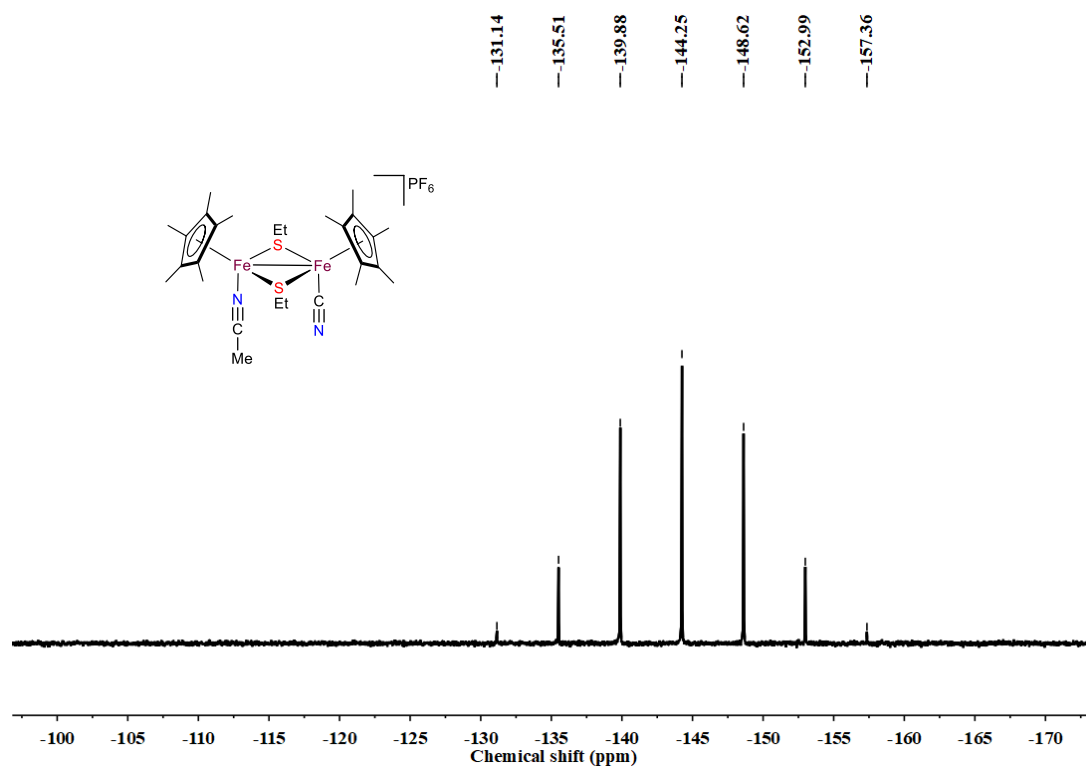

Figure S16. The  $^{31}\text{P}$  NMR spectrum of **2** in  $\text{CD}_2\text{Cl}_2$ .

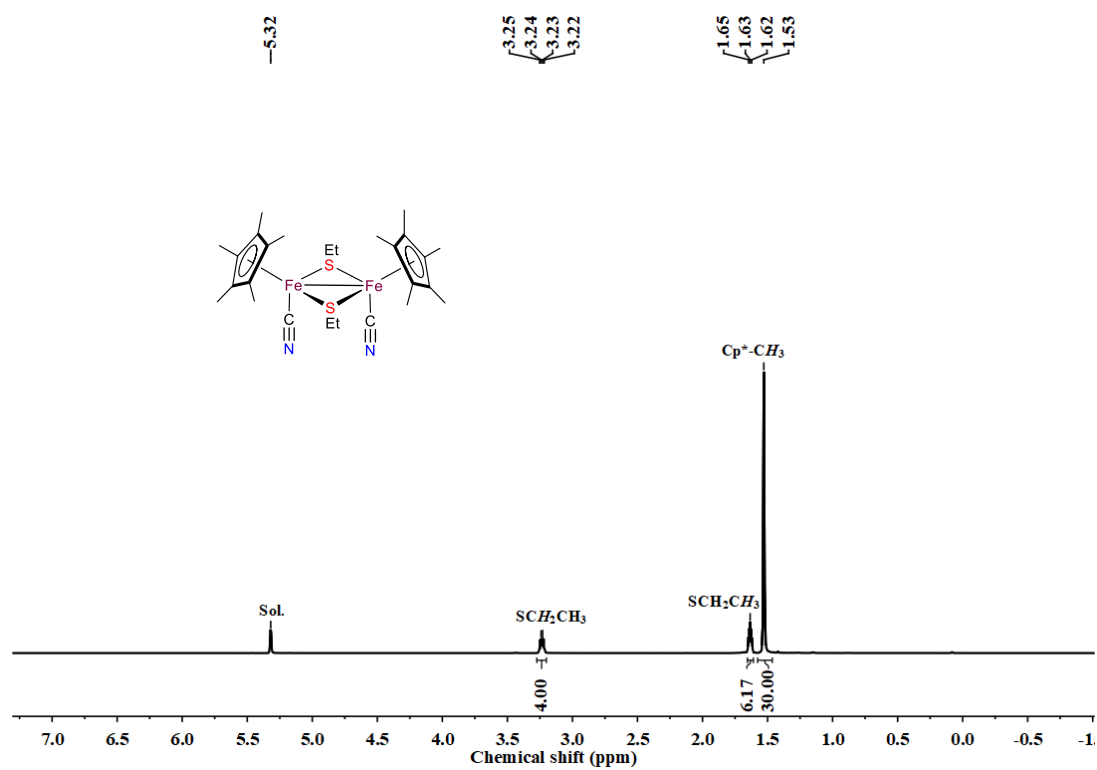

Figure S17. The  $^1\text{H}$  NMR spectrum of **3** in  $\text{CD}_2\text{Cl}_2$ .

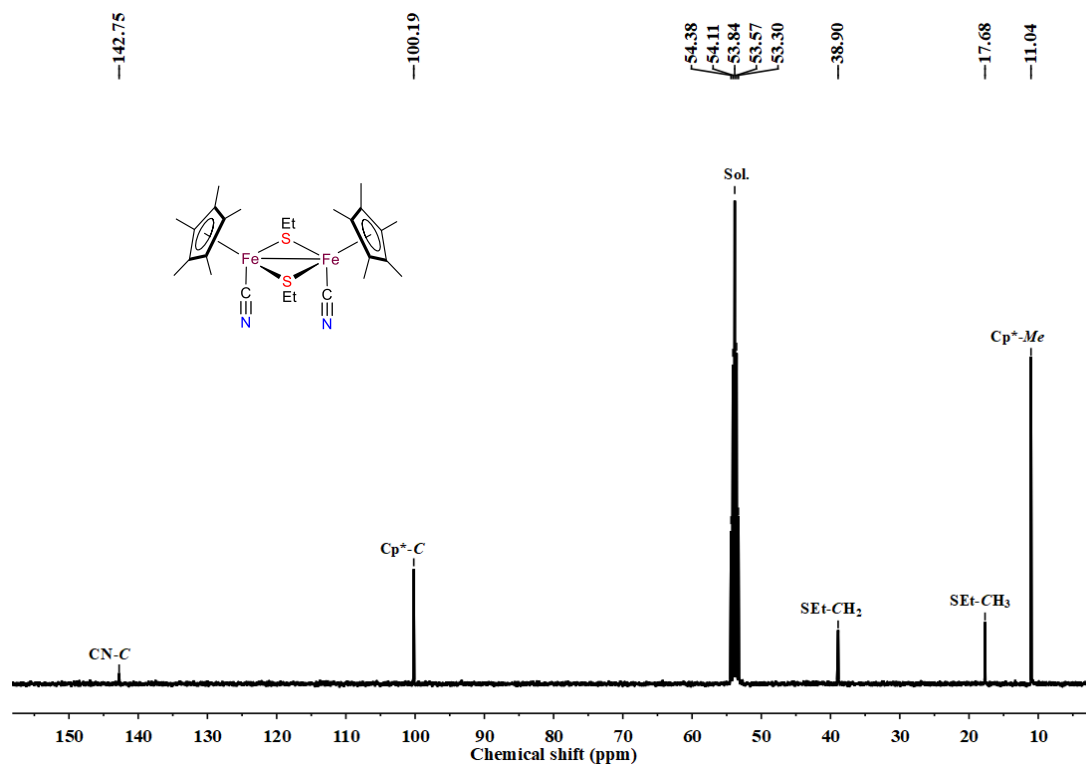

Figure S18. The  $^{13}\text{C}$  NMR spectrum of **3** in  $\text{CD}_2\text{Cl}_2$

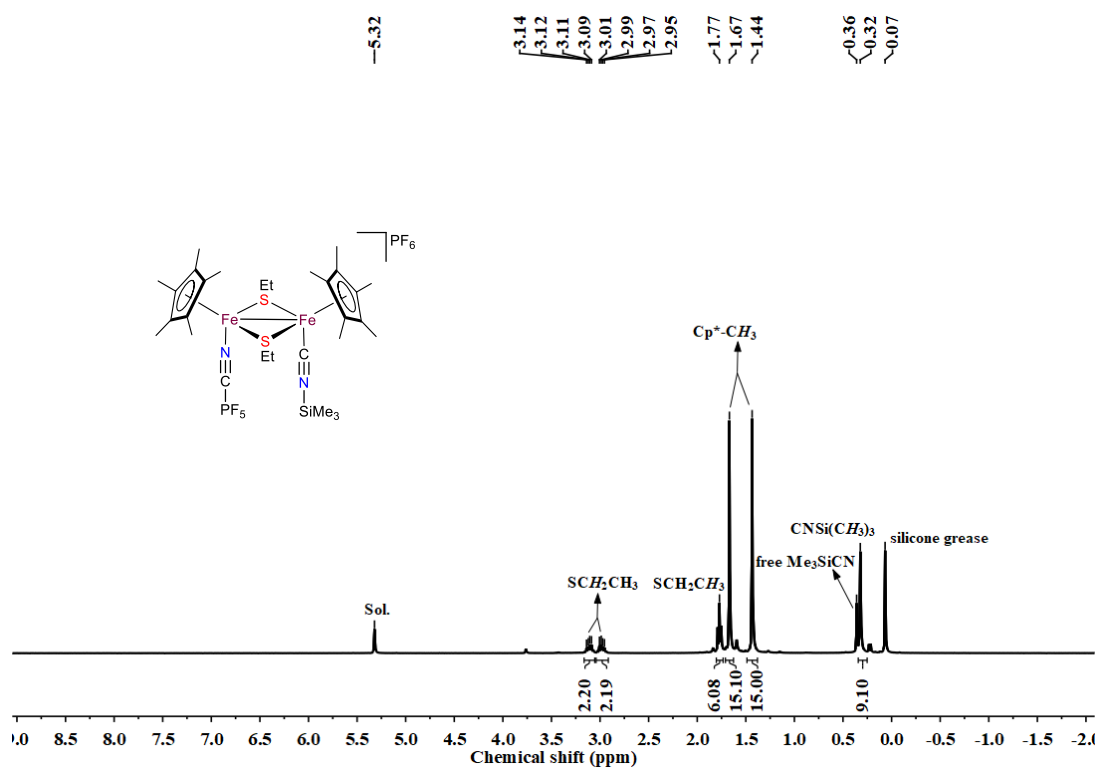

Figure S19. The  $^1\text{H}$  NMR spectrum of **4** in  $\text{CD}_2\text{Cl}_2$ .

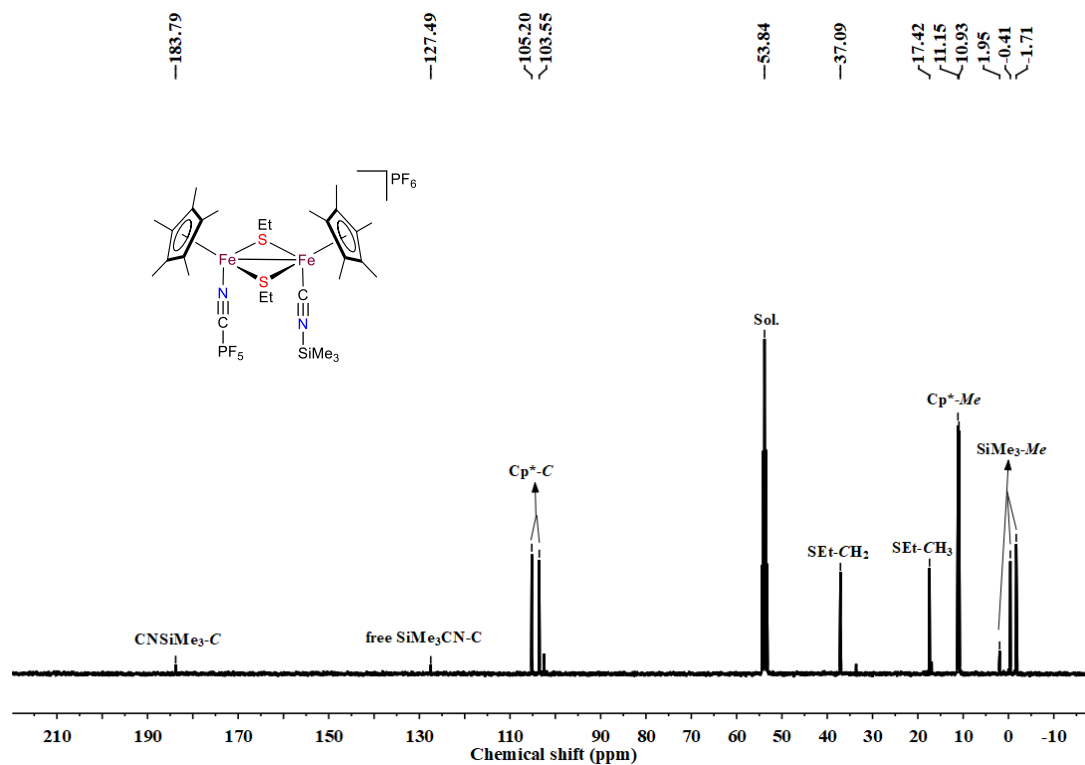

Figure S20. The  $^{13}\text{C}$  NMR spectrum of **4** in  $\text{CD}_2\text{Cl}_2$ .

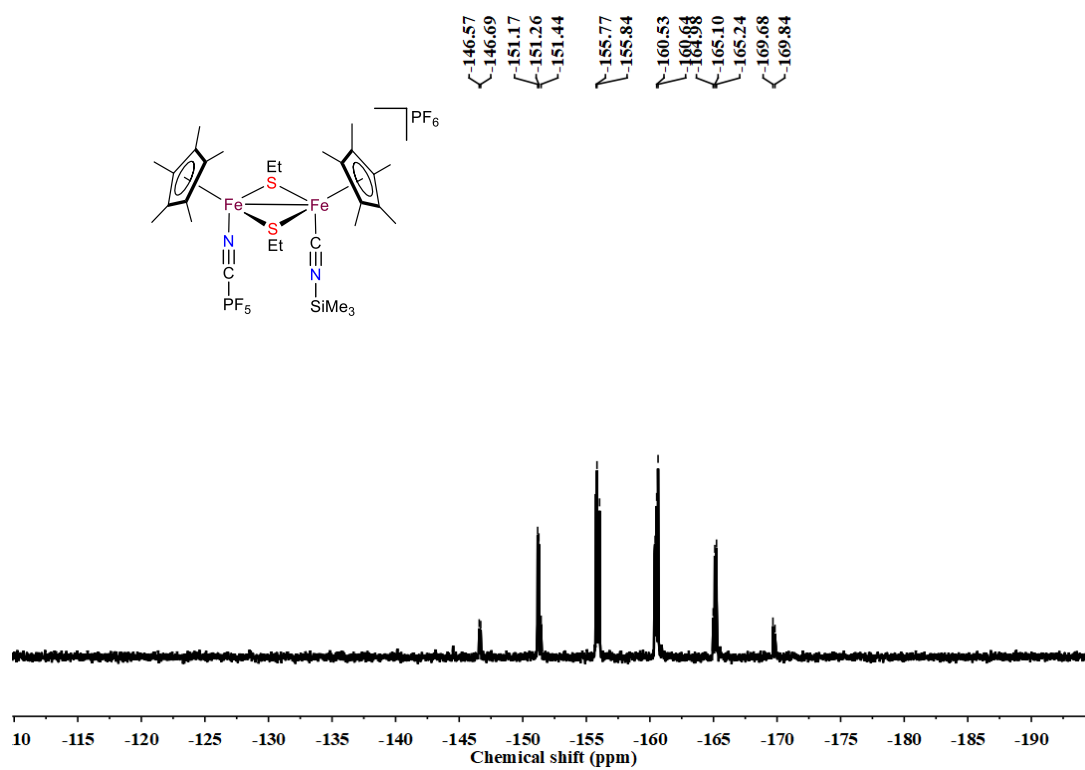

Figure S21. The  $^{31}\text{P}$  NMR spectrum of **4** in  $\text{CD}_2\text{Cl}_2$ .

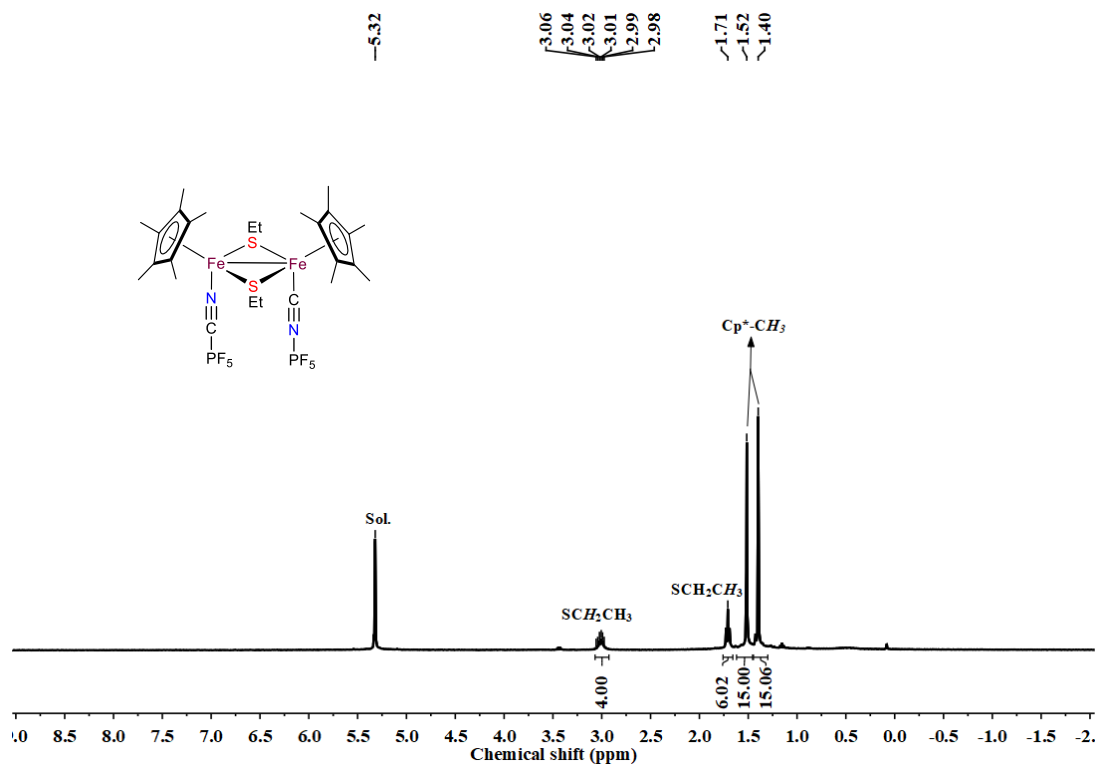

**Figure S22.** The  $^1\text{H}$  NMR spectrum of **5** in  $\text{CD}_2\text{Cl}_2$ .

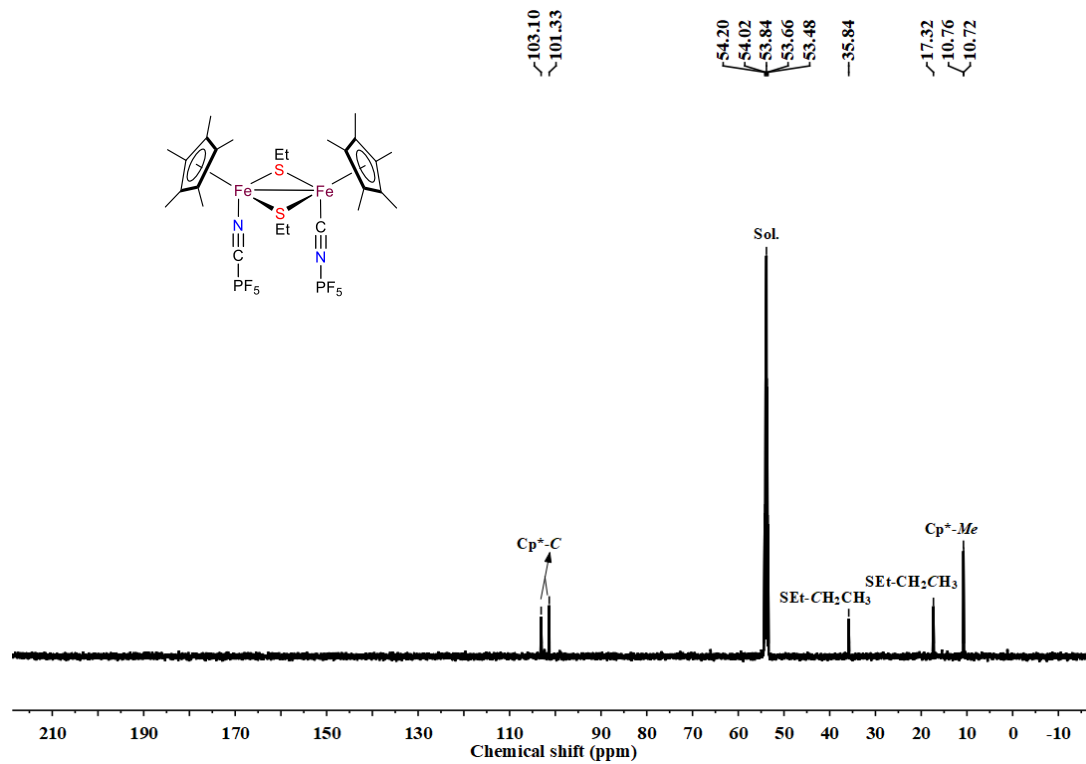

**Figure S23.** The  $^{13}\text{C}$  NMR spectrum of **5** in  $\text{CD}_2\text{Cl}_2$ .

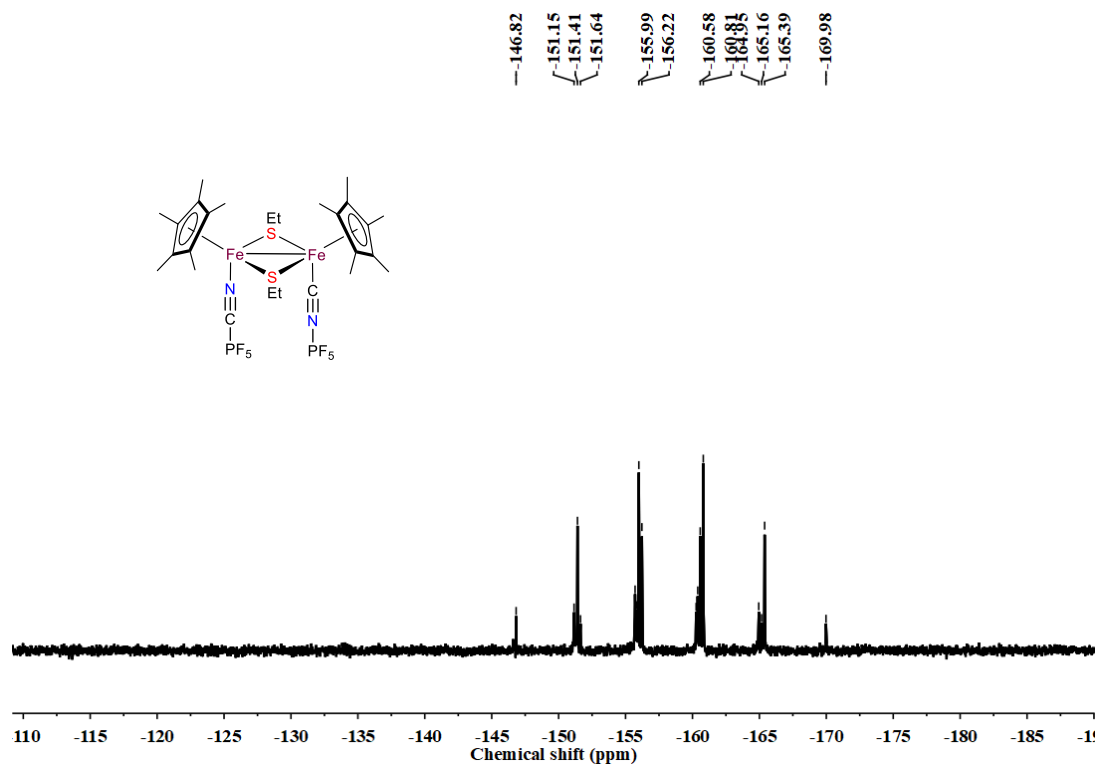

**Figure S24.** The <sup>31</sup>P NMR spectrum of **5** in CD<sub>2</sub>Cl<sub>2</sub>.

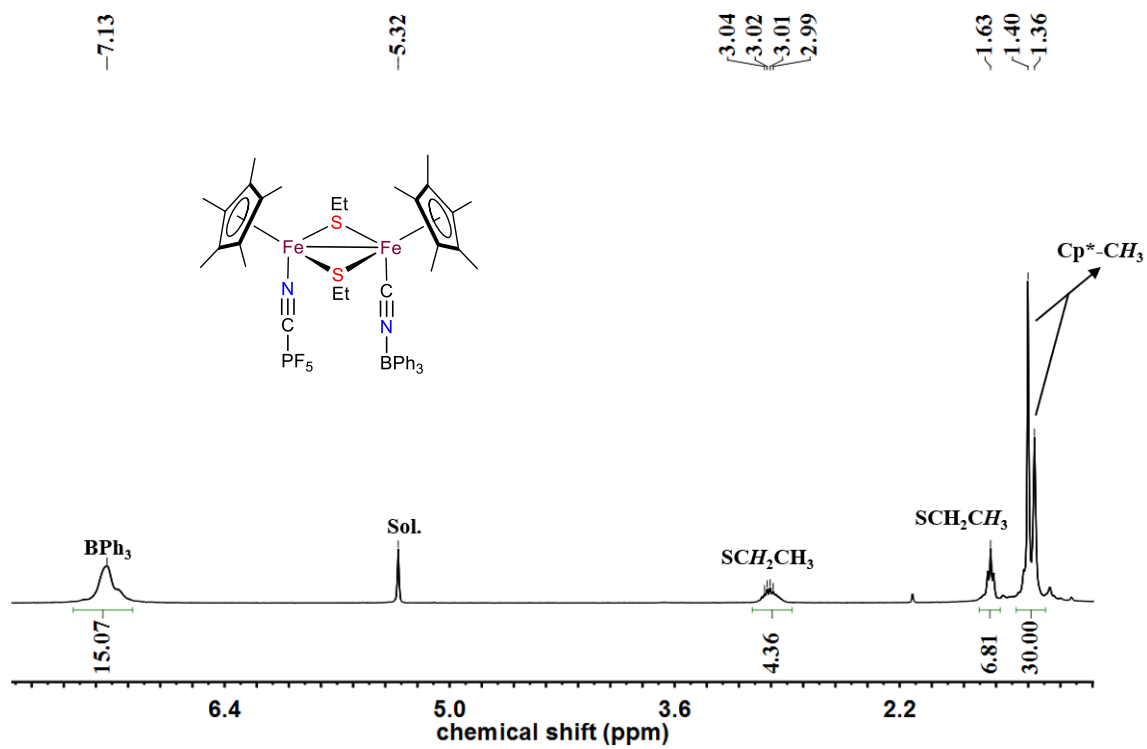

**Figure S25.** The <sup>1</sup>H NMR spectrum of **6** in CD<sub>2</sub>Cl<sub>2</sub>.



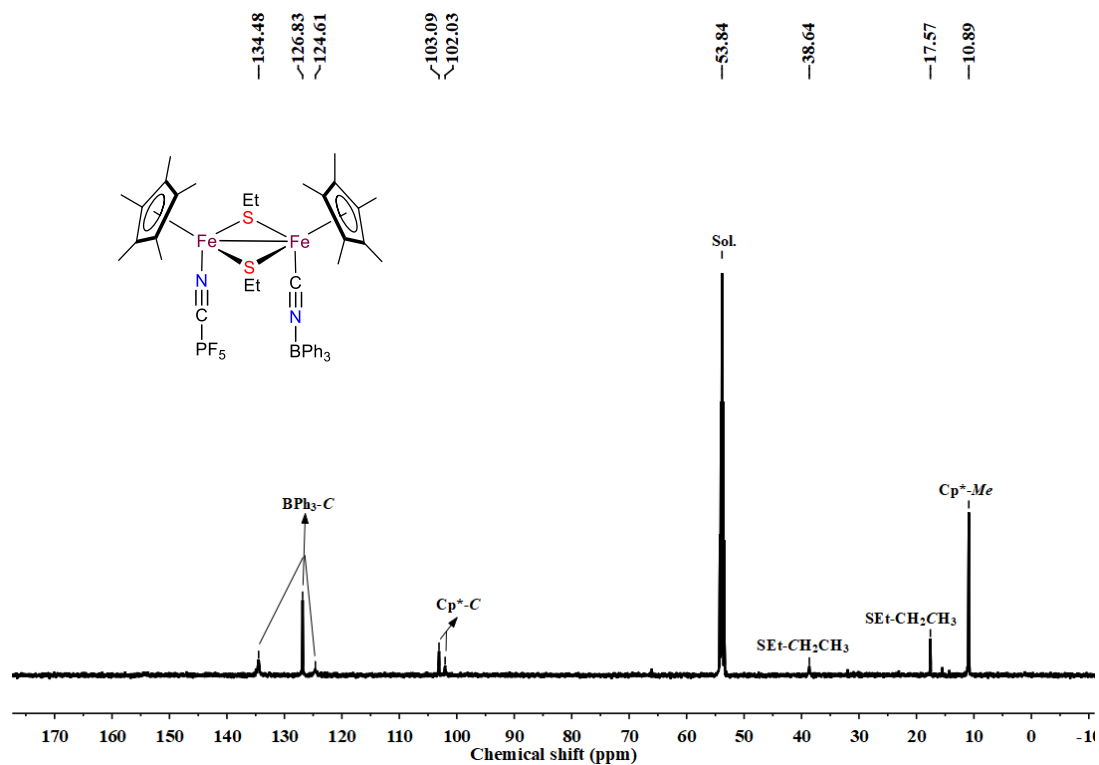

Figure S26. The  $^{13}\text{C}$  NMR spectrum of **6** in  $\text{CD}_2\text{Cl}_2$ .

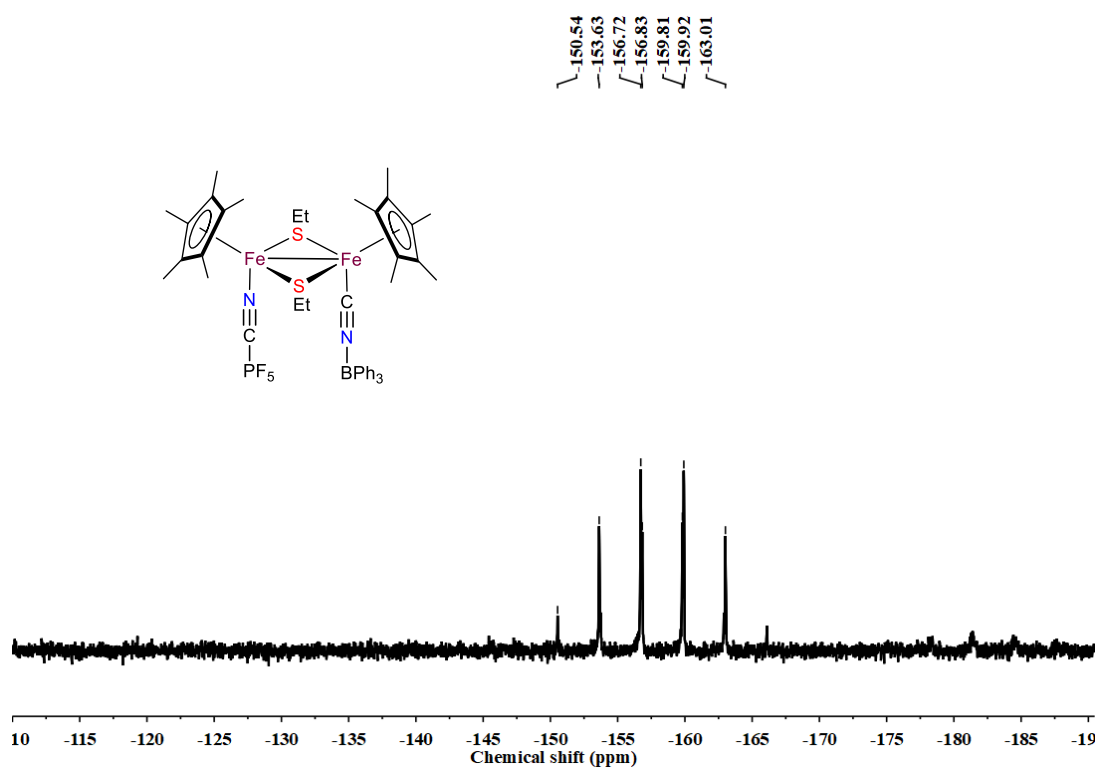

Figure S27. The  $^{31}\text{P}$  NMR spectrum of **6** in  $\text{CD}_2\text{Cl}_2$ .

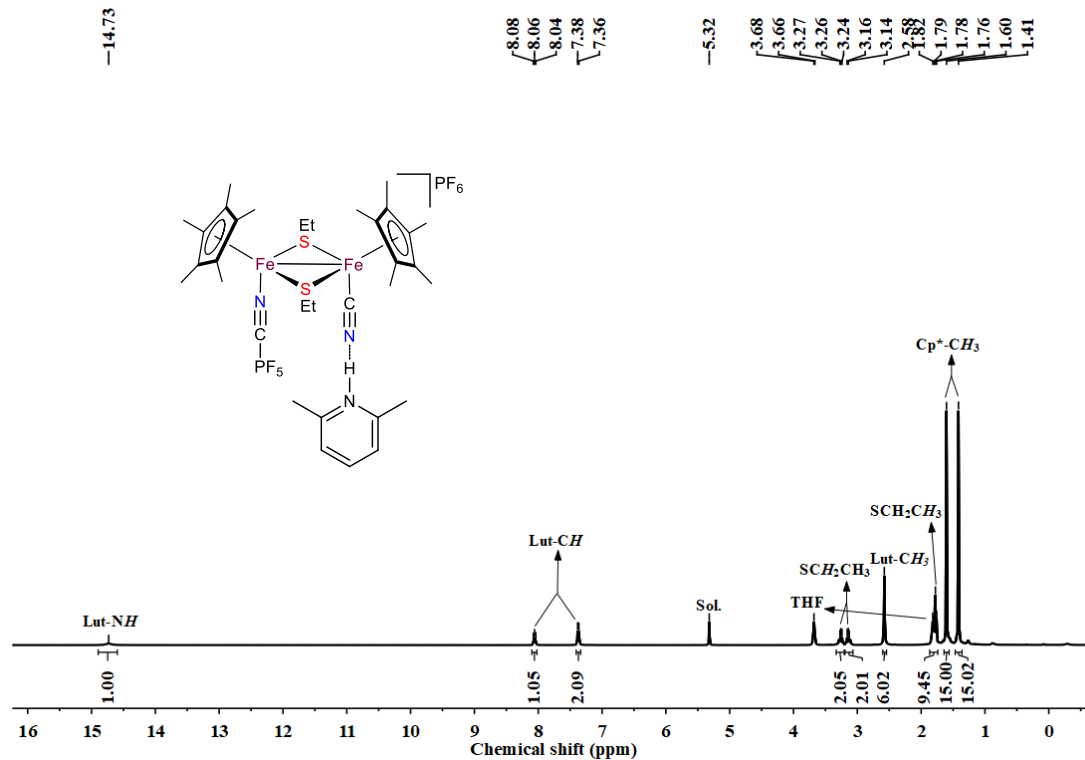

Figure S28. The  $^1\text{H}$  NMR spectrum of **7** in  $\text{CD}_2\text{Cl}_2$ .

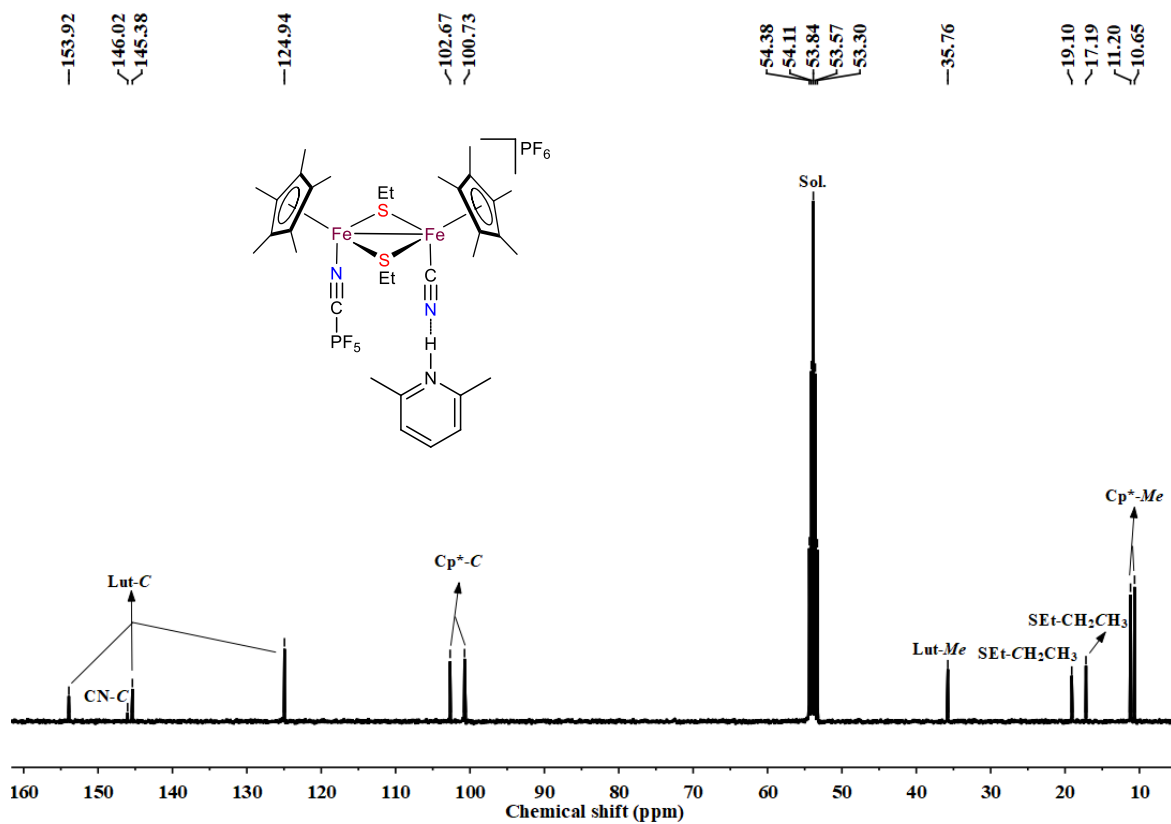

Figure S29. The  $^{13}\text{C}$  NMR spectrum of **7** in  $\text{CD}_2\text{Cl}_2$ .

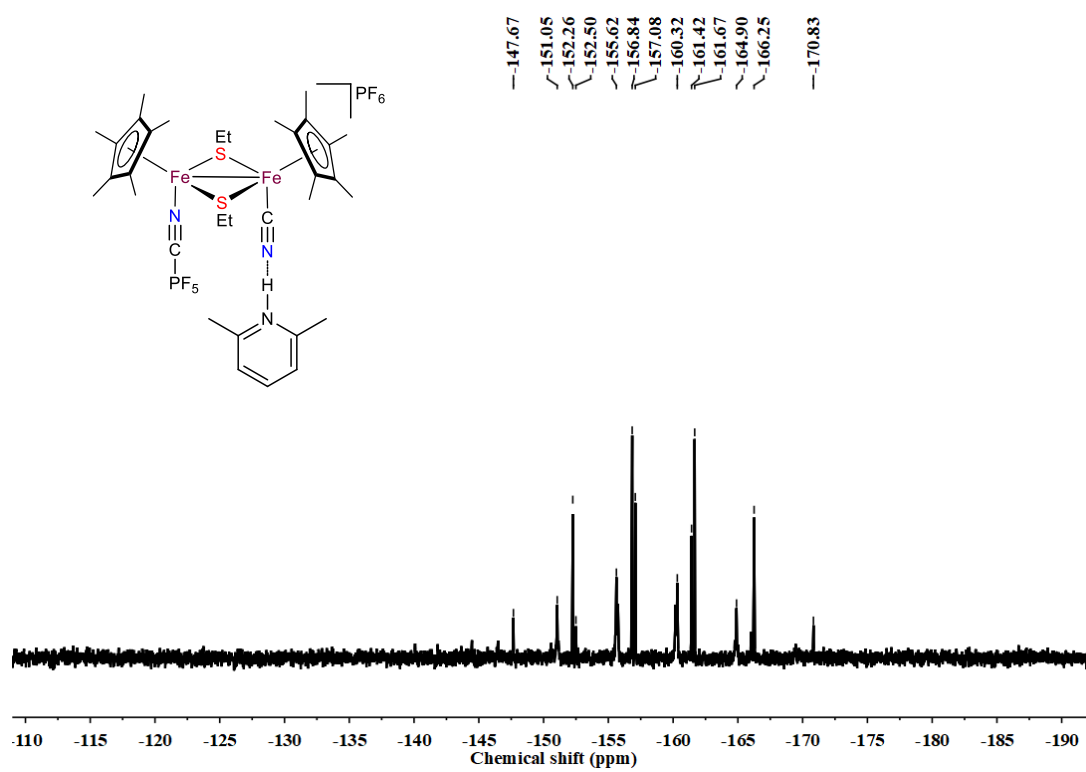

**Figure S30.** The  $^{31}\text{P}$  NMR spectrum of **7** in  $\text{CD}_2\text{Cl}_2$ .

## IV. IR spectra

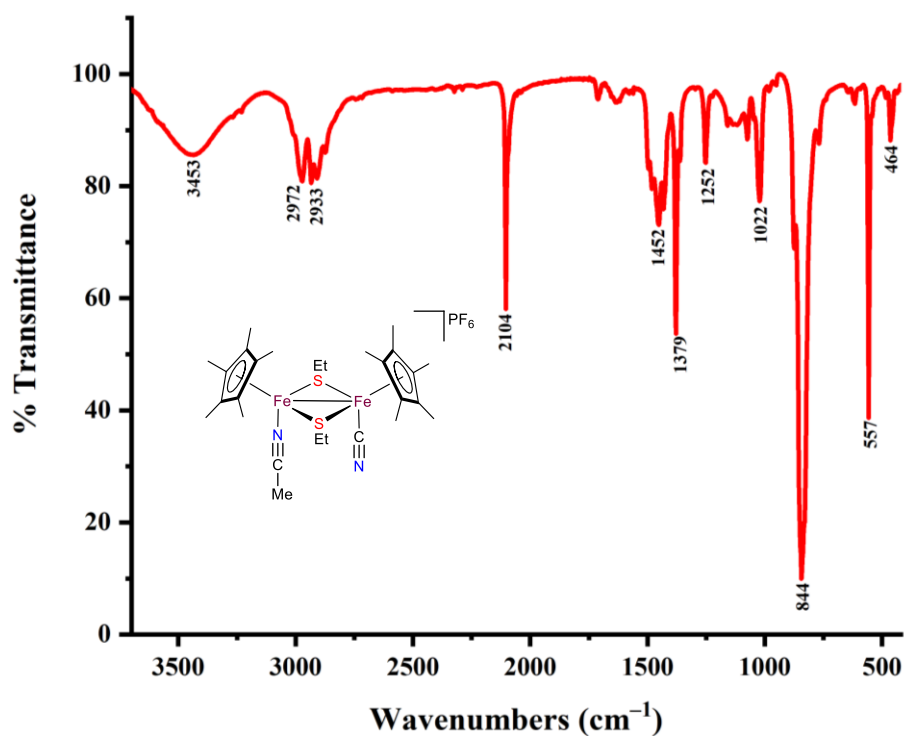

Figure S31. The IR (KBr) spectrum of **2**.

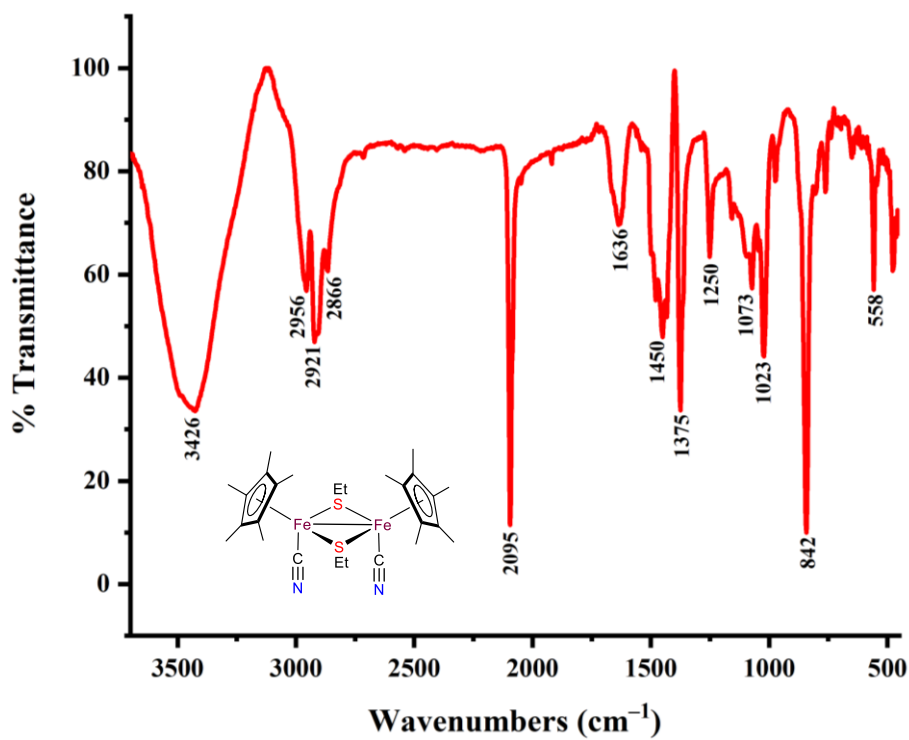

Figure S32. The IR (KBr) spectrum of **3**.

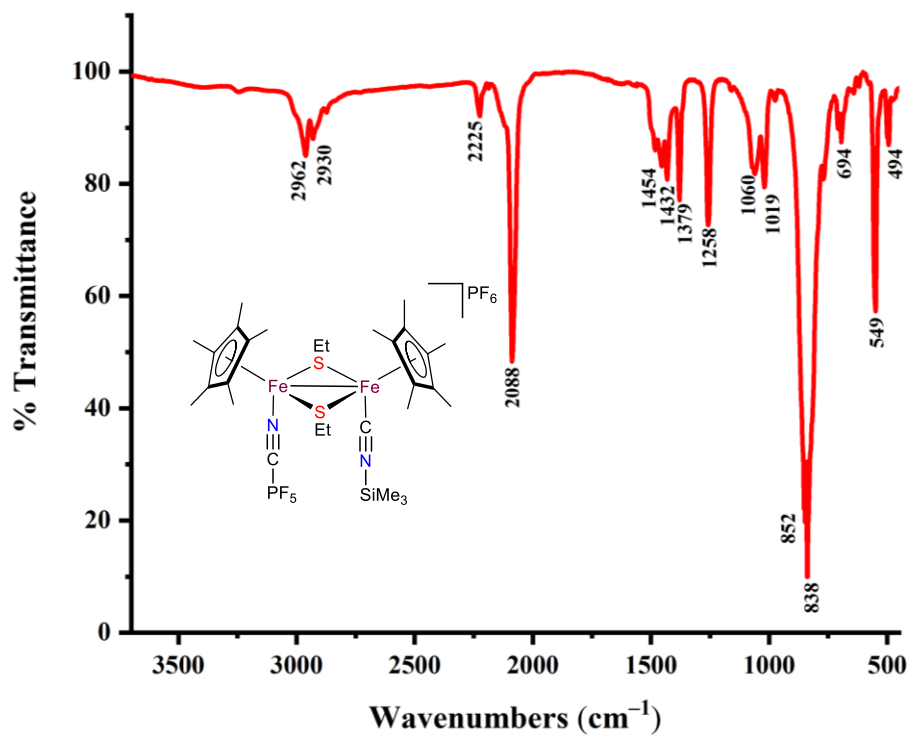

Figure S33. The IR (KBr) spectrum of **4**.

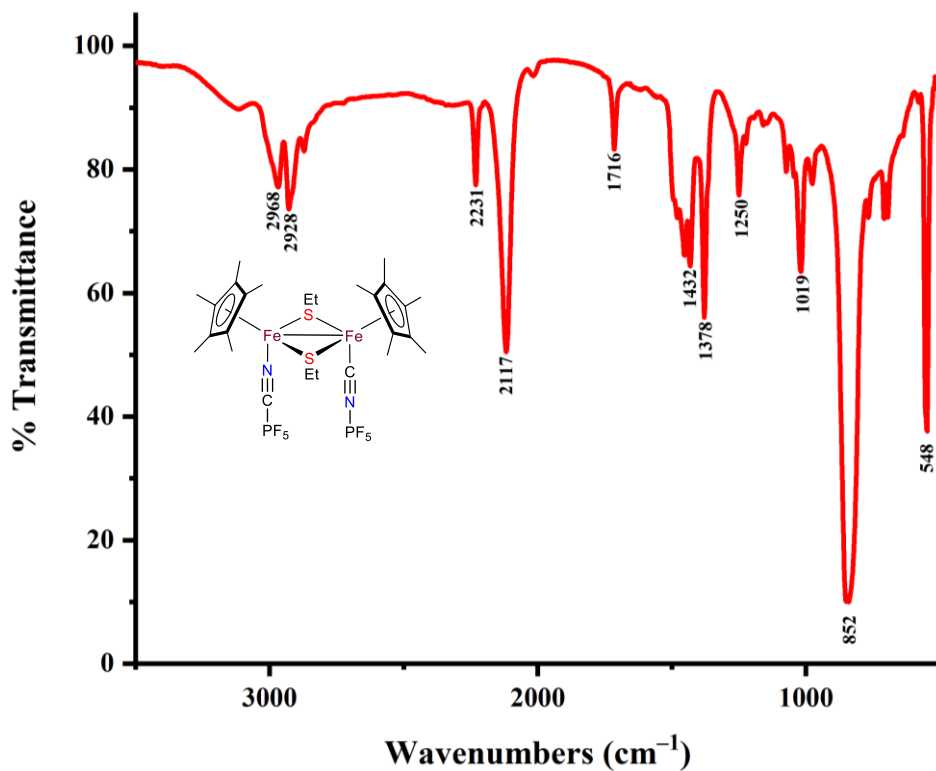

Figure S34. The IR (KBr) spectrum of **5**.

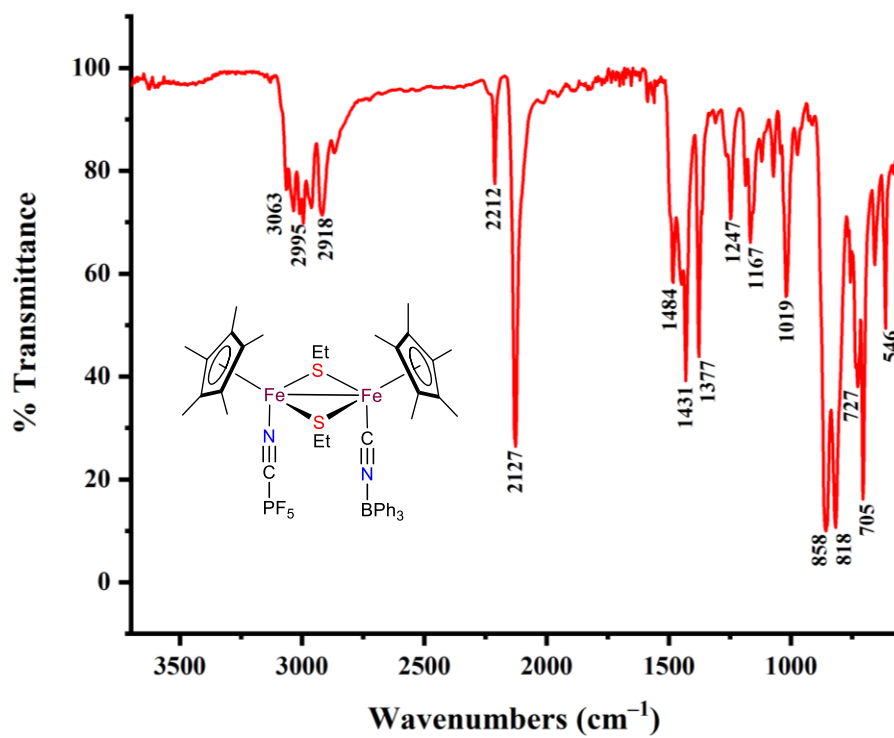

Figure S35. The IR (KBr) spectrum of **6**.

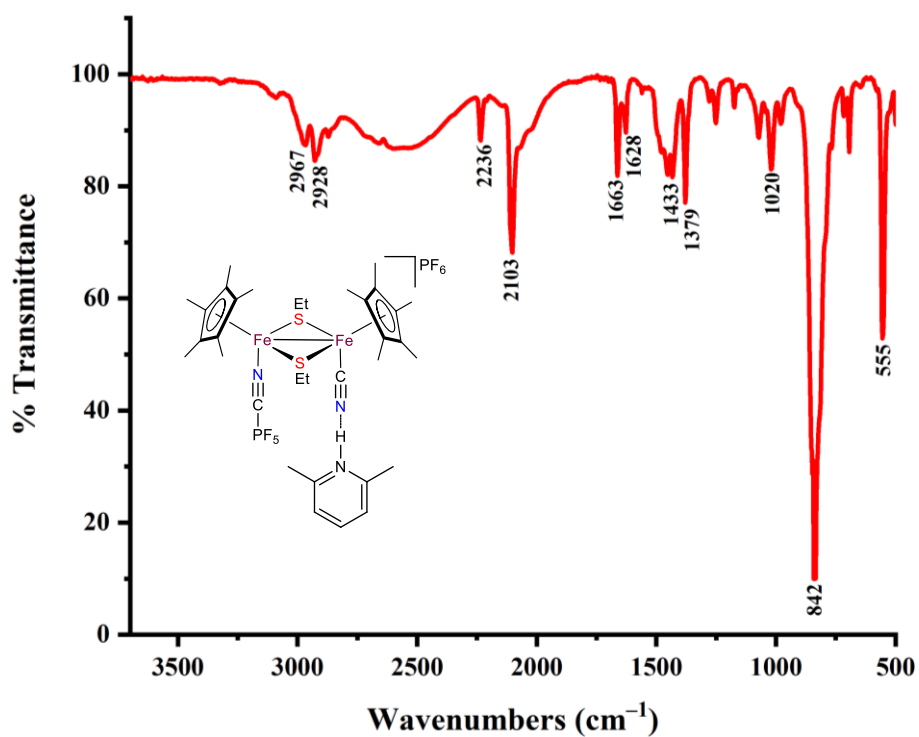

Figure S36. The IR (KBr) spectrum of **7**.

#### IV. *In situ* infrared spectra

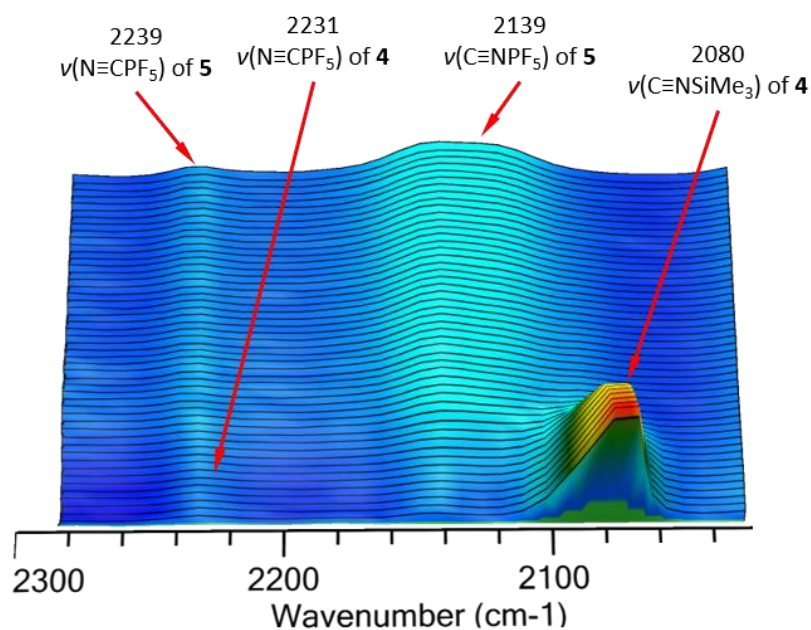

**Figure S37.** *In situ* infrared plot recorded at room temperature showing the formation of **5** from **4** in acetone.

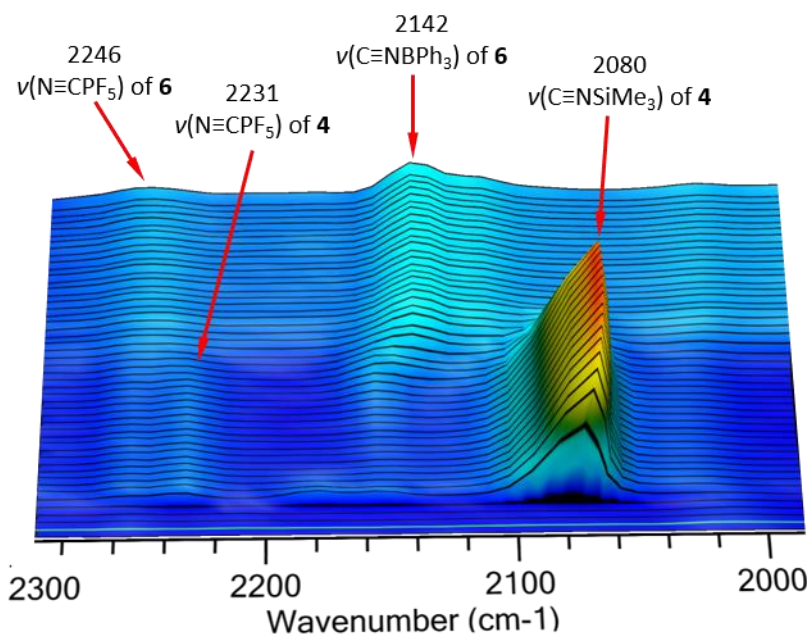

**Figure S38.** *In situ* infrared plot recorded at room temperature from the reaction of **4** with 1 equivalent of NaBPh<sub>4</sub> in CH<sub>2</sub>Cl<sub>2</sub>.

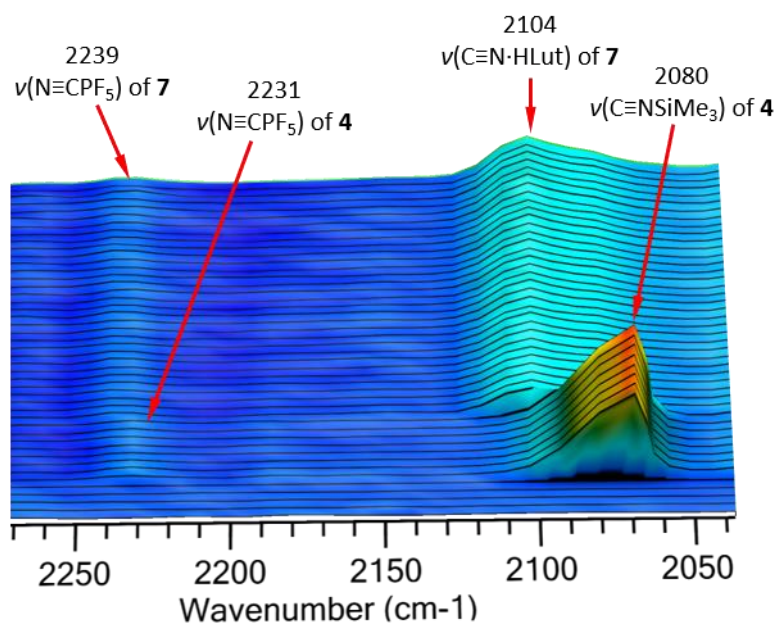

**Figure S39.** *In situ* infrared spectra showing the formation of complex **7** from the reaction of **4** with 1 equivalent of Lut·HCl.
